# Supplementary material for: Sex, strain, and lateral differences in brain cytoarchitecture across a large mouse population
Source: eLife. 2023 May 5;12:e82376. doi: 10.7554/eLife.82376 (PMC10212558; doi:10.7554/eLife.82376)
Supplement: Figure 2—source data 1. [file elife-82376-fig2-data1.xlsx]

## Sheet: Fig 2D  murakami_comparison_mB6
Supplemntary table: Comparison of cell count per region (male C57BL/6J) with Murakami et al. Related to Figure 2D.
Region	Cell count (this study)	Cell count (Murakami et al)
AAA	77928.9	62172
ACA	956681
ACAd	505264
ACAd1	45245	57650
ACAd2/3	105044	117487
ACAd5	197048	95679
ACAd6a	152144	55564
ACAd6b	2895.78	8377
ACAv	450816
ACAv1	36685.3	76161
ACAv2/3	100368	122792
ACAv5	210455	96480
ACAv6a	88008.5	44820
ACAv6b	11431	10088
ACB	1.06379e+06	737719
AD	28984.3	24992
ADP	21454.3	5176
AHN	137954
AI	963996
AId	482509
AId1	17859	30465
AId2/3	100243	93082
AId5	210452	70586
AId6a	147323	28609
AId6b	7695.68	1236
AIp	273874
AIp1	19920	21805
AIp2/3	91654.9	40176
AIp5	87747.4	38623
AIp6a	68894.7	31939
AIp6b	3685.75
AIv	202931
AIv1	12286.3	12137
AIv2/3	64541.6	50995
AIv5	96799.2	53562
AIv6a	27538.9	17086
AIv6b	408.462	54
AM	57470.1
AMd	32289.1	37935
AMv	25457.2	10557
AN	2.55091e+06
ANcr1	1.33983e+06
ANcr2	1.2181e+06
AOB	138598	162226
AOBgl	27270.6	33695
AOBgr	55401.4	56715
AOBmi	55140.4	24891
AON	757053	609318
AP	8795.14	5142
APN	216039	135924
APr	64498.3
ARH	35654.3	54547
ATN	328289
AUD	1.02125e+06
AUDd	218369
AUDd1	16726.2	40146
AUDd2/3	59415.3	89361
AUDd4	32020.7	42945
AUDd5	62701.5	91756
AUDd6a	41811.7	65972
AUDd6b	5359.62	19784
AUDp	381595
AUDp1	36846.7	41408
AUDp2/3	88003	84405
AUDp4	56502.5	41371
AUDp5	130658	90262
AUDp6a	58828.5	65414
AUDp6b	9250.29	19589
AUDpo	118171
AUDpo1	12022.8	6269
AUDpo2/3	30183.4	17236
AUDpo4	19367.1	5476
AUDpo5	36128	17678
AUDpo6a	17472.7	8598
AUDpo6b	2733.87	2239
AUDv	299470
AUDv1	20841.2	36571
AUDv2/3	62689.1	63966
AUDv4	40726.3	29504
AUDv5	103943	76017
AUDv6a	59988.6	61235
AUDv6b	7927.01	18700
AV	82812.3	64084
AVP	14639.6	8635
AVPV	24864.8	8067
B	1082.17	6369
BA	1753.29	5338
BAC	623.792	3870
BLA	231122
BLAa	107322	79139
BLAp	87447.6	44786
BLAv	37617.4	17349
BMA	233980
BMAa	131219	42863
BMAp	101294	87116
BS	1.55322e+07
BST	268294
CA	2.29178e+06
CA1	1.36679e+06
CA1sp	757249	417466
CA1sr	608850	159145
CA2	62126.1
CA2sp	29924.9	21615
CA2sr	32121.6	13047
CA3	870943
CA3sp	469897	275702
CA3sr	394148	101361
CB	1.2227e+07	19777002
CBN	187319
CBX	1.19751e+07
CEA	216143
CEAc	46176.5	51487
CEAl	50455.6	23206
CEAm	119436	53329
CENT	983162
CENT2	306756
CENT3	670012
CH	4.85909e+07
CL	57765.6	30815
CLA	85546.7	130359
CM	47339.4	37117
CN	194432
CNU	9.65886e+06
COA	414327
COAa	113771
COAp	299460
COApl	127198
COApm	171574
COPY	655478
CP	4.68887e+06	3282295
CS	64616.8
CTX	3.87844e+07	28486325
CTXpl	3.75405e+07
CTXsp	1.24921e+06
CU	49355.3	15893
CUL	1.63153e+06
CUL4, 5	1.63153e+06
CUN	60987.2	41027
DCN	60122
DCO	93554.9	126914
DEC	752171
DG	1.51462e+06
DG-mo	285465	415310
DG-po	75170.5	136276
DG-sg	1.14357e+06	709285
DMH	79272.1
DMX	25507.7	11970
DN	52727.9	45665
DORpm	1.95599e+06
DORsm	907407
DP	65941.3
DR	27489.7	18066
DTN	25100.4	19627
ECT	241327
ECT1	15337.4	56636
ECT2/3	70612.6	100470
ECT5	76244.9	92003
ECT6a	68304	53855
ECT6b	9497.78	16352
ECU	24639.7	38728
ENT	1.63725e+06
ENTl	714993
ENTl1	68055.4	116448
ENTl2	181984	6089
ENTl3	135669	89044
ENTl5	163552	104528
ENTl6a	163565	115978
ENTm	907746
ENTm1	163288	46767
ENTm2	240188	60356
ENTm3	183531	45997
ENTm5	199374	19422
ENTm6	125012	44522
EP	328907
EPI	153926
EPd	241662	245983
EPv	88125.7	51418
EW	4436.55	4760
Eth	27094.3
FC	7188.6	10625
FF	28532.7	5205
FL	285842
FN	29727.8	52603
FOTU	274704
FRP	113983
FRP1	13724.9	43620
FRP2/3	24048.3	22051
FRP5	53701.5
FRP6a	21586.7
FS	85963.3	38252
GENd	203516
GENv	66354.9
GPe	182738	189598
GPi	15855.4	34817
GR	10246	5938
GRN	136488	328685
GU	284102
GU1	8377.5	30040
GU2/3	59596.4	58587
GU4	31907.8	14430
GU5	93328.3	63045
GU6a	83103.5	50393
GU6b	5850.45	7180
HATA	88846.8
HB	4.15526e+06
HEM	6.98463e+06
HIP	3.82674e+06
HPF	6.82399e+06
HY	2.41217e+06	2042411
IA	48993.8	32608
IAD	16594	9475
IAM	5935.45	4054
IB	5.4452e+06
IC	930628
ICc	250280	250740
ICd	299869	173664
ICe	375415	380664
IF	11717.3	4386
IG	8904.07	9875
ILA	142832
ILA1	13639.7	22478
ILA2/3	24876.4	51710
ILA5	57588.4	60154
ILA6a	43744.9	49537
ILA6b	1968.63	10193
ILM	269076
IMD	24713	22749
INC	10121	5828
IO	48883.2	116883
IP	101710	80946
IPA	5726.84
IPC	9883.05
IPDL	7289.02
IPDM	5359.99
IPI	4781.53
IPL	6226.88
IPN	58744.2	40938
IPR	14141.4
IPRL	2173.89
IRN	253204	345005
IV	520.824	1277
Isocortex	2.19848e+07
KF	24608	15969
LA	137502	81942
LAT	419942
LAV	9716.53	76545
LC	2114.94	8395
LD	136954	104164
LDT	41414.1	26859
LGd	103513	98573
LGd-co	54219.4
LGd-ip	12393.8
LGd-sh	37524.3
LGv	51599.4	73913
LH	63500.5	63416
LHA	236025	399725
LIN	6657.19	3056
LING	27713.6
LM	9650.09	6668
LP	171378	98341
LPO	86520.5	119393
LRN	25965.5	92768
LRNm	25835.3	80850
LS	507324
LSX	566305
LSc	60259.2	65812
LSr	303251	287010
LSv	140115	18444
LZ	789449
MA	58981	44274
MA3	2472.48
MARN	28388.1	97082
MB	5.63515e+06	4707315
MBO	174776
MBmot	3.11639e+06
MBsen	1.49963e+06
MBsta	209410
MD	197146
MDRN	181727
MDRNd	101234	76756
MDRNv	73596.4	134224
ME	5112.23	4624
MEA	360417
MED	297252
MEPO	8745.55	26325
MEV	1047.07	12085
MEZ	712259
MG	98528.3
MGd	28493.5	30267
MGm	30407.8	22080
MGv	39836.5	57918
MH	86709.6	90365
MM	104883	71373
MMd	17682.5
MMl	36623.1
MMm	29856.1
MMme	15381.2	2030
MMp	5890.95
MO	3.65723e+06
MOB	4.52357e+06	3565499
MOp	1.74626e+06
MOp1	91917.6	192148
MOp2/3	590864	476624
MOp5	512492	403077
MOp6a	523963	288219
MOp6b	23416.4	56939
MOs	1.90064e+06
MOs1	151593	234562
MOs2/3	557518	476721
MOs5	699943	360462
MOs6a	465240	179903
MOs6b	7870.75	19751
MPN	79248.9	26052
MPO	91327.9	95570
MPT	9235.69	18721
MRN	462775	561335
MS	73836.4	75231
MSC	189934
MT	5189.18
MTN	209723
MV	290065	155595
MY	2.55784e+06	4180904
MY-mot	1.47326e+06
MY-sat	15225.5
MY-sen	940265
ND	16945.5	17219
NDB	115394	149596
NI	16627.2	26923
NLL	90022.5
NLOT	44698.4
NLOT1	8970.84	17258
NLOT2	24902.2	19236
NLOT3	10565.4	11781
NOD	379668
NOT	35219.4	26147
NPC	47465.6	33105
NR	4436.42	2936
NTS	149498
OLF	8.52776e+06	6519619
OP	12772.2	13185
ORB	908615
ORBl	428901
ORBl1	27515.5	21573
ORBl2/3	82590	91720
ORBl5	210340	62017
ORBl6a	97934.2	32155
ORBl6b	7771.07	59
ORBm	185692
ORBm1	26783.2	28379
ORBm2/3	41443.6	65710
ORBm5	78833.7	51385
ORBm6a	38996.2	27115
ORBvl	285732
ORBvl1	39159	36665
ORBvl2/3	71637.2	107677
ORBvl5	116826	30618
ORBvl6a	54859.6	35144
ORBvl6b	1909.23	133
OT	679738
P	1.46093e+06	2097835
P-mot	580742
P-sat	296162
P-sen	419819
P5	29092.4
PA	186027	45900
PAA	116331
PAG	764206	695743
PAL	1.40283e+06
PALc	268651
PALd	197007
PALm	245611
PALv	592939
PAR	193027
PARN	167730	221618
PAS	4368.38	2576
PB	164877
PBG	5135.09	9262
PC5	5448.03
PCG	106038	157740
PCN	37210.6	20217
PD	1801.54	384
PDTg	8200.53
PERI	76034.2
PERI1	12684.4	27085
PERI2/3	34913.4	45810
PERI5	17906.5	40418
PERI6a	8274.43	25670
PERI6b	1704.41	10039
PF	77688.6	76108
PFL	1.21811e+06
PG	152351	167328
PGRN	49577.9
PGRNd	13721.4	24842
PGRNl	34736.8	87419
PH	138195	98810
PHY	45481.1
PIL	25331.1
PIR	1.55511e+06
PL	361194
PL1	35133	35283
PL2/3	65369.4	53285
PL5	154690	62183
PL6a	99847.8	51444
PL6b	3551.08	3200
PMd	28629.1	14527
PMv	32213.8	17165
PN	2829.56
PO	161990	110324
POL	22847.3	19069
POR	13555.5	68684
POST	229554
PP	7605.83	18146
PPN	69082.2	42808
PPT	29345	11198
PR	27897.2	1781
PRC	25973.6	12002
PRE	182465
PRM	1.08936e+06
PRNc	104678	187684
PRNr	150632	239930
PRP	40969.1	47685
PRT	360608
PS	19268.2	2748
PSTN	30036	8796
PSV	111522	133864
PT	33402.6	15108
PTLp	479909
PVH	38616.7
PVHd	23891.6
PVR	366319
PVT	80875.8	77707
PVZ	111510
PVa	8355.44	3245
PVi	21245.3	19042
PVp	25023.5	34977
PVpo	21729	13426
PYR	350800
Pa5	3205.41
PeF	33599.5
PoT	20117.4
ProS	155405
RAmb	104632
RCH	12986.1	39917
RE	79856.8	67606
RH	19029.1	21601
RHP	2.91712e+06
RN	72449.4	37268
RPA	1298.79	11191
RPF	9896.8
RR	10830.3	40252
RSP	2.24861e+06
RSPagl	496360
RSPagl1	68704.1	20483
RSPagl2/3	173986	47942
RSPagl5	155038	34007
RSPagl6a	94928	31531
RSPagl6b	3405.38	6436
RSPd	772444
RSPd1	111958	62621
RSPd2/3	253198	129867
RSPd5	245650	133114
RSPd6a	155678	88192
RSPv	988005
RSPv1	156496	125871
RSPv2/3	340162	225205
RSPv5	346718	261607
RSPv6a	133136	138911
RSPv6b	5172.89	12282
RT	197952	233177
SAG	13214.8	11324
SBPV	25158	25963
SCH	18279.4	22510
SCO	795.39
SCdg	195049	229571
SCdw	50581	11126
SCig	454326	553286
SCiw	393710	111106
SCm	1.09464e+06
SCop	144965	81881
SCs	533431
SCsg	310912	234250
SCzo	78209	124673
SF	52681	40653
SFO	3441.03	5172
SG	2776.83	4507
SGN	26980.5	14554
SH	7339.8	8082
SI	533336	280961
SIM	1.17552e+06
SLC	2981.19	4026
SLD	6458.53	8460
SMT	45245.8	17707
SNc	26993.8	40692
SNr	192063	125404
SO	4331.84	8241
SOC	50623.7
SOCl	23152.7	2573
SPA	16220.9	7484
SPF	23501.7
SPFm	11720.8	11992
SPFp	12124	31881
SPIV	56813.5	64954
SPVC	240148	148083
SPVI	177009	320881
SPVO	70614.6
SS	6.56418e+06
SSp	4.94932e+06
SSp-bfd	1.33797e+06
SSp-bfd1	81088	118289
SSp-bfd2/3	301502	319501
SSp-bfd4	416287	248596
SSp-bfd5	215154	268887
SSp-bfd6a	311243	284306
SSp-bfd6b	19527.4	54127
SSp-ll	464463
SSp-ll1	25527.2	59770
SSp-ll2/3	125812	114573
SSp-ll4	84291.2	57215
SSp-ll5	103028	131668
SSp-ll6a	122342	109803
SSp-ll6b	6894.78	31551
SSp-m	1.1921e+06
SSp-m1	58858.5	38459
SSp-m2/3	277907	106276
SSp-m4	277427	52203
SSp-m5	226796	96611
SSp-m6a	335532	83825
SSp-m6b	15321	12374
SSp-n	625781
SSp-n1	37064.2	14935
SSp-n2/3	126233	37923
SSp-n4	175085	26811
SSp-n5	104248	33733
SSp-n6a	174575	30200
SSp-n6b	5372.36	6500
SSp-tr	283190
SSp-tr1	19851.1	79175
SSp-tr2/3	89581.4	161777
SSp-tr4	45652.1	89793
SSp-tr5	68679.6	161466
SSp-tr6a	54489.9	123162
SSp-tr6b	5576.53	25513
SSp-ul	752983
SSp-ul1	38855.8	68691
SSp-ul2/3	188263	190594
SSp-ul4	168816	120834
SSp-ul5	145644	176531
SSp-ul6a	203508	166076
SSp-ul6b	8133.02	36532
SSp-un	253551
SSp-un2/3	63669.2	83638
SSp-un4	55027.6	29841
SSp-un5	47382.4	73543
SSp-un6a	67823.9	65367
SSp-un6b	2851.17	12002
SSs	1.61486e+06
SSs1	93482.6	80646
SSs2/3	362706	175997
SSs4	279771	96789
SSs5	397268	169536
SSs6a	450107	183244
SSs6b	33508.1	47142
STN	32513.1	33014
STR	8.26778e+06
STRd	4.68887e+06
STRv	1.83455e+06
SUB	358178
SUM	39500.3
SUT	29928.4	14038
SUV	27690.4	57775
Su3	7176.83
SubG	4142.8	3805
TEa	514127
TEa1	39213.8	77064
TEa2/3	116881	118904
TEa4	61653.4	36538
TEa5	167621	130566
TEa6a	113935	83962
TEa6b	14575.9	26162
TH	2.9936e+06	2504115
TM	17391.7
TMd	6520.53	2024
TMv	10604.2	4633
TR	124980
TRN	49360.4	50473
TRS	54327.7	55748
TT	148054
TTd	87962.2
TTv	61495.6
TU	56799.2	71096
UVU	609728
V	34363.6	36105
VAL	106510	110798
VCO	101724	125007
VENT	643256
VERM	4.97982e+06
VII	66013.7	84877
VIS	2.90594e+06
VISC	356737
VISC1	18233.5	25892
VISC2/3	81810.6	56874
VISC4	34381.5	21860
VISC5	109810	55549
VISC6a	103241	56484
VISC6b	9802.49	9755
VISa	282895
VISa1	24371
VISa2/3	92615.3
VISa4	41556.3
VISa5	69236.5
VISa6a	52633.3
VISa6b	5209.3
VISal	146082
VISal1	11581.2	41047
VISal2/3	40033.4	72820
VISal4	26298.8	32747
VISal5	39169.5	93580
VISal6a	26455.5	68468
VISal6b	2986.13	16181
VISam	154601
VISam2/3	45072.4	47699
VISam5	46404.2	65051
VISam6a	31173.2	58671
VISl	249062
VISl1	22341.3	21380
VISl2/3	61615.6	37038
VISl4	47230.2	10301
VISl5	62771.3	29820
VISl6a	51553.3	21733
VISl6b	4046.47	3604
VISli	95668.3
VISli1	8099.29
VISli2/3	24236.9
VISli4	13914.7
VISli5	29726.4
VISli6a	17752.1
VISli6b	1660.63
VISp	1.63553e+06
VISp1	191852	122433
VISp2/3	490220	240073
VISp4	307122	112234
VISp5	339419	219254
VISp6a	274573	184551
VISp6b	20749	38605
VISpl	180355
VISpl1	34870.6	19274
VISpl2/3	52847.3	30973
VISpl4	8268.24	9130
VISpl5	54116.6	24168
VISpl6a	28187	14464
VISpl6b	1083.55	3649
VISpm	216711
VISpm1	22297.7	15110
VISpm2/3	66046.6	39774
VISpm4	28388.9	16259
VISpm5	58811.4	35187
VISpm6a	37526.7	38822
VISpm6b	3762.94	3524
VISpor	234430
VISpor1	27957.4
VISpor2/3	73682.5
VISpor4	14705.5
VISpor5	74012.8
VISpor6a	42650.9
VISpor6b	3961.82
VISrl	197031
VISrl1	18497.3
VISrl2/3	56935.4
VISrl4	39012.9
VISrl5	44118.6
VISrl6a	34862.4
VISrl6b	3539.14
VLPO	4266.63	2126
VM	113759	59803
VMH	102007
VMPO	3413.02
VNC	380802
VP	402826
VPL	107554	101367
VPLpc	11293.9	6785
VPM	256859	137472
VPMpc	29730.1	15722
VTA	49249.6	80720
VeCB	3368.57
XII	33996.8	44196
Xi	17178.4
ZI	277175	268378
grey	7.62578e+07	74227727
sAMY	702609	461585
y	2845.57	2239

## Sheet: Fig 2E (Diameter + density)
Supplemntary table: Table showing the median cell diameter and cell density per region over all 507 brains in this study. Related to Figure 2E.
Region	Estimated median diameter (um)	Cell density
ENTl3	9.29511	132687
ENTl2	9.02589	135839
AIp2/3	9.00719	149817
PERI	8.9704	115109
AId2/3	8.94343	144656
TR	8.93016	110249
MOs2/3	8.92025	198347
PL2/3	8.90541	199576
AIv2/3	8.86408	137102
ACAd2/3	8.8388	213778
BLAp	8.82099	159547
ENTl	8.77503	129721
ORBl2/3	8.76938	173629
ECT2/3	8.7415	185796
TTd	8.73905	153958
ORBvl2/3	8.73064	183087
ENTl5	8.71533	142912
ProS	8.67795	142087
PL5	8.66403	207783
COApl	8.64731	133274
AIp	8.64145	144403
MOp2/3	8.63959	213853
AIp5	8.62443	159148
AId5	8.62127	182031
VISC2/3	8.59817	194514
PAA	8.59373	130102
AI	8.58746	155615
ECT5	8.58417	190834
AUDv2/3	8.57969	213642
AIv	8.57692	146198
TEa2/3	8.5763	219588
ACAd5	8.56438	218216
AId	8.55903	166783
ECT	8.54852	171729
CA3	8.54343	164991
TT	8.54303	134661
MOs	8.53659	178821
COAp	8.52725	144189
BLA	8.52595	156402
PL	8.52487	190285
DP	8.51676	170412
MOs5	8.50787	200769
GU2/3	8.50276	196590
SSs2/3	8.4973	219768
ENTm2	8.49443	217429
SSp-m2/3	8.49029	231834
ENT	8.48905	154491
BMAp	8.48475	181207
AIv5	8.48309	174719
PA	8.47465	217927
VISpor2/3	8.47373	253226
ORBvl5	8.46231	235377
MO	8.45823	184566
ILA	8.44652	221129
ACAd	8.44344	201573
COApm	8.42047	153749
MOp5	8.40737	200410
SSp-n2/3	8.40533	243896
ORBvl	8.39817	201746
SSp-ul2/3	8.38952	252151
FRP	8.38027	159155
ACA	8.37657	212391
RHP	8.3699	169663
MOp	8.36869	191295
ACAv5	8.36344	258349
SSp-ll2/3	8.35605	257907
COA	8.35391	152975
ENTm3	8.35114	224146
ORBm	8.34629	175199
CA	8.34253	164823
SUB	8.34151	190270
ORB	8.34121	193050
ECT6a	8.34009	223417
AUDp2/3	8.33688	249667
BLAv	8.31918	117119
AM	8.3163	184071
MD	8.31156	190976
CA2	8.31083	146025
VISa2/3	8.30612	282146
SSp-bfd2/3	8.30487	255085
ACAv	8.29605	226557
ATN	8.29534	198045
ORBl	8.29181	196339
ORBm5	8.29079	223639
AV	8.28962	249214
HPF	8.28214	181801
LD	8.27531	178580
SSp-ll5	8.26989	231832
ORBl5	8.26932	223127
TEa	8.26751	206144
BLAa	8.26075	174591
PIR	8.25395	166165
VISC5	8.25394	202466
VISpor	8.24738	213035
ENTm	8.24432	181238
TEa5	8.24152	232484
SSp-tr2/3	8.24082	279452
PAR	8.23708	183362
VISC	8.23526	191926
DG-po	8.23349	174818
AUDv	8.22929	207461
APr	8.22801	206852
VISpor5	8.21965	245344
HIP	8.21099	193563
MED	8.2071	195830
CTXsp	8.19703	177587
CA1	8.18624	165777
AUDv5	8.18319	230722
Isocortex	8.17583	215166
GU	8.17014	205095
GU5	8.16849	219398
CTX	8.16259	207731
CTXpl	8.16109	208932
ENTm1	8.15865	89745.9
RSPagl2/3	8.15523	324825
ENTl6a	8.15041	185764
VISpm	8.14678	253394
VISp2/3	8.13903	309945
MOs1	8.13839	71793.9
HATA	8.12946	208946
CLA	8.12698	235038
AId6a	8.12533	232147
VISam	8.11946	248255
AUD	8.10035	220944
CH	8.09995	207684
VISa	8.09512	246377
BMA	8.0854	198304
VAL	8.07711	165495
LA	8.0748	205580
VISpl	8.07103	229614
RSPagl1	8.06893	115016
TTv	8.06505	113870
ENTm5	8.06252	257070
AUDd	8.05963	225622
SSp-ll	8.05952	241706
SSs	8.05478	220704
PTLp	8.05407	244369
AUDp	8.05059	224159
SSp-tr	8.04081	254849
PFL	8.02806	252696
TEa6a	8.02363	280125
MTN	8.02156	232738
RSPagl5	8.01701	269158
grey	8.01699	199599
FL	8.01413	258349
RSPagl	8.01015	240455
DG-sg	8.00784	645450
SSp-ul5	8.00683	231146
DORpm	8.00419	196251
AUDp5	7.99727	241140
VIS	7.99395	252886
PRE	7.99077	220048
SSp-m	7.98815	230331
VISrl	7.98762	241553
AIp6a	7.98551	201521
OLF	7.98533	217940
SS	7.98249	238068
ANcr2	7.98198	258941
GU6a	7.98037	250365
VII	7.98029	136548
PO	7.97335	179535
AUDpo	7.96909	240664
DG	7.96672	268894
SSp-ul	7.96445	241761
MDRNd	7.96281	168012
PRM	7.96197	249331
HEM	7.95994	256420
SSp	7.95656	244306
VISli	7.95402	245181
SSs5	7.95226	229001
VISC6a	7.95189	246849
TH	7.94948	191457
AN	7.94926	264504
MG	7.94786	200439
LS	7.94569	213694
DEC	7.9453	239352
EPd	7.94529	172453
EP	7.93706	150764
RSPd2/3	7.93606	304150
SSp-un	7.93381	244471
CL	7.93203	201686
GENd	7.92954	198840
OT	7.92817	214161
EPI	7.92645	291627
CBX	7.92222	262520
CB	7.92175	255790
SIM	7.92075	239909
VISp	7.92036	265968
VISl	7.91884	246210
ANcr1	7.91859	269672
LGd	7.91773	205486
CENT2	7.91715	283764
LP	7.91526	189224
SSp-n	7.91213	246764
VISal	7.91095	244132
LSX	7.91026	201862
CP	7.90937	211554
STRd	7.90937	211554
LAT	7.90869	181497
MA	7.90599	252763
COPY	7.89801	286511
EPv	7.89688	111857
SSp-bfd5	7.89459	230847
MV	7.89384	216647
SSp-m5	7.88847	227002
SSp-bfd	7.88609	257216
CENT	7.88272	284970
ILM	7.87909	210916
FOTU	7.87555	269128
DCO	7.87496	200789
LGd-co	7.8717	185519
VM	7.86934	172056
VERM	7.86727	271449
STR	7.86656	216241
CENT3	7.86542	284731
DORsm	7.86106	183704
MOp6a	7.85683	220958
RSPd5	7.85659	250113
CUL	7.85454	268438
CUL4, 5	7.85454	268438
VENT	7.8533	181764
RSPv5	7.85188	258780
NOD	7.85079	314047
SCsg	7.83925	309530
CNU	7.83534	208260
RSPd	7.83456	226032
PG	7.82909	229300
PYR	7.82837	281585
STRv	7.82533	258416
VISp5	7.81846	270946
LSr	7.81835	209900
IP	7.81676	187746
SSp-n5	7.81526	233719
CBN	7.81282	183008
VPM	7.81211	221147
VP	7.81034	197945
RSP	7.80767	243092
ORBl6a	7.80198	238554
SCs	7.80007	263599
AON	7.79307	195624
ICd	7.79196	276414
DCN	7.78933	187634
UVU	7.7893	276853
CEA	7.78343	208427
MOs6a	7.77643	234941
IB	7.77625	191391
RE	7.77322	252441
P-mot	7.7718	192234
ACB	7.76185	301081
BS	7.76081	173594
ENTm6	7.75673	232412
PRNc	7.75654	170880
SOC	7.75107	192767
CN	7.74833	198334
MOB	7.74746	315610
MY-sen	7.74415	188684
SCop	7.74363	283273
MBsta	7.74282	177649
ORBl1	7.73669	91712.6
SCzo	7.73603	164674
MBsen	7.73569	248960
APN	7.73235	224305
PL6a	7.73021	269457
P	7.71855	179337
PRT	7.71813	219879
SCig	7.71716	259336
SSp-ll6a	7.71636	272361
SSs4	7.71416	308284
SCiw	7.71099	229149
PF	7.70485	207771
POST	7.70463	237987
ICe	7.70272	222468
IC	7.70186	248319
SSs6a	7.69924	267435
AOB	7.69823	230660
SCm	7.69716	231661
MB	7.69332	188081
PRNr	7.68759	175301
sAMY	7.68281	209009
SPVC	7.68054	193921
MBmot	7.67919	184974
SNr	7.67893	152538
PALv	7.67673	203030
P-sat	7.67542	187915
MEA	7.66944	202912
ACAd6a	7.66032	262408
P-sen	7.6577	194674
VPL	7.65384	171950
FS	7.64836	239687
SI	7.64825	200234
PB	7.64355	197922
RSPv	7.63864	260302
SCdg	7.63814	204166
CUN	7.63701	168021
PPN	7.62828	172898
VCO	7.62661	187793
ORBvl1	7.61944	126234
BMAa	7.61154	214446
AAA	7.60365	199846
NTS	7.59861	204226
LZ	7.59225	200072
COAa	7.58492	183730
PAL	7.58316	176603
MPN	7.57672	253239
ICc	7.57515	277024
SSp-ul6a	7.56651	255085
ZI	7.56444	207204
DG-mo	7.56333	85318.7
RSPagl6a	7.56214	293752
PSV	7.55921	190040
GPe	7.5589	148648
PAG	7.55415	199201
LGv	7.55391	191505
SSp-m6a	7.54903	247995
VISp6a	7.54748	325420
VISp4	7.54475	376091
SSp-m4	7.5402	353037
GENv	7.5401	194792
SSp-bfd6a	7.53271	285639
VMH	7.51503	233839
PCG	7.50481	218240
RSPv2/3	7.50112	383662
HY	7.49704	199113
LPO	7.48973	203578
MEZ	7.48655	226844
SSp-n6a	7.48606	263615
BST	7.48104	229503
CEAm	7.48092	197800
PALc	7.48033	229376
RT	7.47564	177781
MPO	7.47514	212210
SSp-n4	7.47172	374023
MBO	7.45726	224473
RSPd6a	7.45134	260883
MM	7.44662	262144
PVR	7.44472	226408
TU	7.4429	180667
PH	7.43403	230499
SSp-ul4	7.43338	383033
SSp-bfd4	7.43318	382387
LSv	7.41143	294156
RSPv6a	7.39505	256677
SF	7.38427	143112
AHN	7.37051	239320

## Sheet: BrainID_cleandata
100140949
100141219
100141222
100141223
100141273
100141434
100141435
100141454
100141473
100141495
100141563
100141596
100142569
100142580
100142655
100147785
100147853
100147861
100148142
100148143
100148443
100148503
100148554
112162251
112167395
112229103
112229814
112306316
112307754
112308468
112372418
112373124
112373830
112423392
112424102
112424813
112458114
112458831
112459547
112460257
112597496
112745073
112745787
112789899
112791318
112826458
112827164
112827872
112882565
112935169
112936582
113095845
113166056
113313632
113368085
113368898
113369603
113400134
113442864
113443572
113504763
113505468
113553300
113554719
113696423
113766038
113766744
113783321
113784293
113846682
113884251
113887162
113933871
113935285
113935990
114008220
114008926
114045733
114046440
114047146
114155923
114249084
114250546
114290938
114292355
114399224
114399934
114400640
114427219
114428632
114429338
114472860
114473794
114754390
114755099
115958825
116900714
116903230
116903968
116904684
117302771
117312486
117316260
119846129
119846838
119847544
119848249
120280191
120280939
120282354
120436274
120436988
120437703
120438416
120491896
120493315
120494024
120494729
120570964
120571672
120572378
120760759
120761491
120762196
120811946
120812686
120875111
121145045
121145750
121146455
121509005
121509711
122640358
122641784
122642490
123662982
123663689
123664417
124059700
124060405
125361005
125363160
125435783
125436508
125437216
125437921
125801033
125801739
125802444
126190033
126353451
127140981
128003477
147633169
147708352
155736539
156252954
156254369
156315468
156394513
156492394
156493815
156494530
156546627
157711043
157909001
157911832
158017916
158019342
158020947
158139883
158255941
159209586
159223001
159224478
159319654
159329308
159330754
159373612
159550125
159602279
159651060
159651770
159941339
160150861
160153696
160537018
160537796
160540013
160540751
161463521
162018169
166271142
166460484
166461193
166461899
166533924
167026321
167117360
167212217
167212932
167439900
167440619
167441329
167511639
167512351
167513067
167569313
167570021
167571459
167793416
167904255
167904966
168002780
168004394
168096467
168097187
168165712
168229113
168362462
168363874
168364580
168454779
168455487
171019004
171021122
171067319
171275617
171485060
175718634
175731154
175732001
175739085
175816975
175817683
175818392
176497015
176886238
176899332
177319236
177319974
177780284
177783204
177904363
177907797
178283952
178487444
179641666
181859467
181891184
182029174
182029881
182041643
182042349
182144176
182224715
182280916
182341627
182460343
182467026
182516286
182794184
182888003
182890735
182896517
183173527
183175010
183284388
183329222
183329991
183330908
184157585
184158290
184159706
184167484
204832917
232311959
249327301
249396394
258315443
264631432
265288825
265289624
265291552
265293391
265487421
266582782
267608343
267660272
267661018
267704653
267749821
267750528
267760731
267761438
267762146
267762859
267763584
267810394
267811103
268205344
268206050
268208632
272822110
277907462
277908168
278068196
278069982
278171908
278173743
278174451
278178382
278179794
278258073
278398243
278503555
278504263
278511717
286417464
286648290
286648997
286649703
286835688
286882342
287459601
288168426
288324211
292124058
292124765
292125472
292126180
292172846
292173552
292174264
292209592
292210312
292372636
292477301
292478008
292479421
292533477
293011049
293889922
293942897
294266031
294311830
297652799
297858011
297892843
297894255
297945448
297946154
297987980
298230624
298275548
298325807
298350212
298835152
299244730
299408890
299448592
299656382
299732033
299781566
299782273
300623424
301180385
301421960
301422682
309515141
309564818
310193233
475616128
485022109
577298618
