# Supplementary material for: Sex, strain, and lateral differences in brain cytoarchitecture across a large mouse population
Source: eLife. 2023 May 5;12:e82376. doi: 10.7554/eLife.82376 (PMC10212558; doi:10.7554/eLife.82376)
Supplement: Figure 4—source data 1. [file elife-82376-fig4-data1.xlsx]

## Sheet: Fig 4B C57BL6J
Supplemntary table: Table showing median values per region for cell count, volume and cell density for male and female C57BL/6J. Related to Figure 4B.
Region	BL6_male_vs_female_count3d_ranksum_qval	BL6_male_vs_female_density3d_ranksum_qval	BL6_male_vs_female_coverage_ranksum_qval	BL6_male_vs_female_volume_ranksum_qval	Count_males	Volume_males (mm^3)	Density_males (cells/mm^3)	Count_females	Volume_females(mm^3)	Density_females (cells/mm^3)
AAA	0	1	0	-1	79530.7	0.395159	198542	76989.9	0.396814	192125
ACAd2/3	-1	0	-1	-1	106549	0.507979	210649	106809	0.517688	206489
ACAd5	-1	0	-1	-1	200662	0.950763	210637	203049	0.967734	208231
ACAd6a	0	-1	-1	0	155749	0.613107	251376	152409	0.609474	253791
ACAv5	-1	0	-1	-1	212041	0.838603	253789	213656	0.851073	251778
ACB	0	0	0	-1	1.07773e+06	3.55025	304806	1.07385e+06	3.59436	299754
AHN	1	1	0	1	139128	0.573627	242337	127712	0.556309	227170
AId2/3	-1	0	-1	-1	101344	0.723607	141115	102454	0.724608	140559
AId5	-1	-1	-1	-1	212901	1.18521	176483	218576	1.22574	176656
AId6a	0	0	0	-1	147760	0.657442	222635	147514	0.671174	221475
AIp2/3	-1	0	-1	-1	93570.2	0.643831	147129	95007	0.663406	142436
AIp5	0	1	0	-1	92578.2	0.592946	156035	89361.8	0.615626	143406
AIp6a	0	0	0	0	69721.6	0.356312	198504	68707.1	0.355119	192147
AIv2/3	-1	0	-1	-1	65597.2	0.487537	132940	67062	0.508339	129771
AIv5	-1	0	0	-1	97543.6	0.563631	170968	99673.5	0.59507	166004
AM	-1	-1	-1	-1	58867.8	0.318945	183219	61231.9	0.330818	184358
ANcr1	0	-1	-1	-1	1.34021e+06	4.84588	276454	1.32929e+06	4.89584	277292
ANcr2	0	-1	-1	0	1.22503e+06	4.61969	265020	1.19073e+06	4.58784	265406
AOB	1	0	0	1	142598	0.571141	249230	129819	0.552375	236502
AON	0	1	0	-1	768599	3.90619	195831	729996	3.93306	187720
APN	0	0	-1	0	238184	1.00969	231730	229927	1.00734	226663
APr	1	1	-1	1	65053.6	0.311785	209354	61036.3	0.307101	203513
AUDd	0	1	0	-1	222891	0.993416	222789	219069	1.00851	215338
AUDp2/3	1	1	0	-1	89234.6	0.358985	247190	86026.2	0.362924	235572
AUDp5	1	1	0	0	133757	0.564641	238387	128255	0.551198	229203
AUDpo	1	0	0	0	119968	0.505907	237099	117218	0.50395	232603
AUDv2/3	1	1	0	-1	64111.2	0.298409	212628	60849.3	0.30262	201322
AUDv5	1	1	0	-1	105494	0.458555	227444	102034	0.461361	219668
AV	-1	0	-1	-1	83735.4	0.33996	249169	87766.1	0.351425	246630
BLAa	1	1	-1	-1	108770	0.620255	175714	100185	0.621344	161541
BLAp	1	1	-1	-1	88931.5	0.558037	157255	82431.5	0.56519	147957
BLAv	1	1	0	-1	38168	0.332839	116098	34877.7	0.33293	106267
BMAa	1	1	0	1	133509	0.618131	217665	125993	0.602204	206284
BMAp	1	1	0	0	103258	0.57399	177511	96034	0.565265	167875
BST	1	0	-1	1	270130	1.18894	228793	248002	1.09735	225209
CA1	1	0	-1	0	1.37159e+06	8.27093	166048	1.34583e+06	8.20764	163208
CA2	-1	-1	-1	0	62328.3	0.435635	143133	62860.2	0.432739	144398
CA3	0	-1	-1	1	878312	5.41276	159958	861837	5.31915	160422
CEAm	1	1	0	1	122581	0.615849	199013	111177	0.592982	187190
CENT2	-1	-1	-1	-1	302522	1.06924	282142	311101	1.09422	285945
CENT3	0	0	-1	0	672723	2.31222	295031	666009	2.30997	294690
CL	0	-1	-1	-1	59567	0.298979	195793	58756	0.300947	196623
CLA	-1	0	0	-1	85990.6	0.378637	229879	88803.7	0.387466	225550
COAa	1	0	-1	1	115366	0.622637	185228	105550	0.602634	178984
COApl	0	0	0	1	128061	0.982849	131470	123656	0.959474	127798
COApm	1	0	0	1	174054	1.13264	154626	164487	1.09915	151955
COPY	0	-1	-1	0	657815	2.2519	292829	653394	2.24931	293986
CP	0	0	-1	-1	4.76456e+06	21.8293	213993	4.70567e+06	22.7003	211099
CUL4, 5	0	-1	-1	-1	1.63487e+06	5.96232	274943	1.62616e+06	5.97018	275282
CUN	0	0	-1	0	74584.7	0.451899	164556	67068.4	0.446505	154438
DCN	0	0	-1	0	75101.8	0.375607	199656	70162.9	0.370451	187734
DCO	0	0	-1	-1	102866	0.502903	209118	100749	0.503317	203739
DEC	-1	0	-1	-1	758005	3.12339	242929	760852	3.15654	242521
DG-mo	1	1	-1	1	288802	3.39119	84826.6	266130	3.30272	81263.6
DG-po	1	1	0	-1	76098.2	0.437446	176862	72535.2	0.438223	166009
DG-sg	1	-1	-1	1	1.16073e+06	1.78885	645506	1.12788e+06	1.73327	649013
DP	-1	-1	0	-1	66808.2	0.40118	165427	67454.7	0.405492	165714
ECT2/3	-1	1	0	-1	71147.6	0.369794	189665	71327.6	0.385518	181643
ECT5	0	1	0	-1	77448.6	0.405829	189749	75596.4	0.411982	183909
ECT6a	0	0	0	-1	68847.1	0.310956	221526	67773	0.315549	214591
ENTl2	0	0	0	-1	184541	1.32505	138912	177149	1.34088	132862
ENTl3	1	1	0	-1	136718	1.02404	132485	129119	1.02956	126202
ENTl5	1	1	0	0	166319	1.16774	142889	157386	1.1523	137915
ENTl6a	1	1	0	1	164753	0.884885	183012	156408	0.876602	177450
ENTm1	1	1	-1	0	164264	1.7745	92483.8	153282	1.76689	88060.4
ENTm2	0	0	0	-1	241950	1.10985	217631	235829	1.11772	212343
ENTm3	1	1	0	-1	186785	0.822314	225726	176396	0.82681	213336
ENTm5	1	0	0	0	202595	0.76257	260775	191774	0.76113	254503
ENTm6	1	1	0	0	129661	0.52924	239524	116438	0.523956	228053
EPI	0	0	-1	0	171185	0.567834	302360	168393	0.563292	300353
EPd	0	1	0	-1	248266	1.44518	169861	237117	1.46871	162894
EPv	1	1	0	-1	89754.5	0.80284	111180	80808	0.808366	101061
FL	0	-1	-1	1	288268	1.10828	261684	286282	1.08218	267200
FOTU	0	-1	-1	-1	275898	0.982007	276453	269920	0.984294	278884
FRP	-1	-1	0	-1	117222	0.765717	153892	121428	0.804887	155519
FS	1	1	0	0	87598.3	0.356148	248377	83315.5	0.352323	236038
GPe	0	0	0	-1	237438	1.52206	152411	212677	1.52298	139100
GU2/3	0	0	-1	-1	60523.5	0.3115	195257	59742.6	0.31727	189288
GU5	-1	0	0	-1	94966.8	0.440945	216659	96421.2	0.45956	211371
GU6a	-1	0	0	-1	84231.6	0.342084	246064	85288.6	0.355865	242386
HATA	-1	0	-1	-1	89979	0.420803	213130	90143.9	0.427643	209321
ICc	-1	-1	-1	0	251253	0.869965	289037	252168	0.864394	292575
ICd	0	0	-1	-1	302253	1.05053	286034	301817	1.05463	281491
ICe	0	0	-1	0	393805	1.71386	228235	381334	1.68272	225658
ILA	-1	-1	0	0	146388	0.688402	212258	149314	0.688346	218341
IP	0	0	-1	1	156170	0.74083	211752	132535	0.715943	183645
LA	1	1	0	-1	137881	0.666584	206099	132176	0.673969	195556
LD	-1	-1	-1	-1	139119	0.807903	172332	142544	0.820181	174960
LGd-co	0	0	-1	0	62066.1	0.346516	177631	57924.7	0.341735	171065
LGv	0	0	0	1	71377.1	0.345308	205185	61302.5	0.333462	179076
LP	0	0	-1	0	185053	1.00328	181460	178300	0.999499	180251
LPO	1	1	0	0	104093	0.49437	218189	83482.4	0.487715	174638
LSr	0	1	0	-1	309704	1.48242	208005	297665	1.51181	197960
LSv	0	0	0	0	142730	0.4891	292445	141115	0.477295	291295
MA	0	0	0	-1	77548.5	0.301025	272874	73514.8	0.303632	262997
MD	-1	0	-1	-1	201735	1.0814	186521	204442	1.10564	185072
MDRNd	-1	-1	-1	-1	146368	0.904926	159897	157270	0.918955	172083
MEA	1	0	0	1	368641	1.7801	206036	329566	1.6663	197277
MG	0	0	-1	0	118307	0.577939	198202	108102	0.573463	187768
MM	0	0	0	0	123264	0.44404	286085	119460	0.440179	272757
MOB	0	-1	-1	1	4.64696e+06	13.766	336563	4.46747e+06	13.4009	336631
MOp2/3	-1	0	0	-1	599724	2.86956	211301	606007	2.96787	205637
MOp5	-1	1	-1	-1	516752	2.641	197957	521998	2.74287	190748
MOp6a	0	0	-1	-1	535105	2.44579	217776	525022	2.51308	215405
MOs1	0	0	0	-1	152575	2.25561	67850.3	150274	2.30068	65780.2
MOs2/3	-1	-1	-1	-1	563290	2.93131	193058	587786	3.02949	194652
MOs5	-1	0	-1	-1	704889	3.65047	195137	732811	3.82794	191452
MOs6a	0	0	0	0	485438	2.15235	221961	475291	2.14665	221174
MPN	1	0	-1	1	80060.7	0.31835	253523	75157.2	0.301747	245268
MPO	1	0	-1	1	94115.1	0.445096	211098	88651.6	0.433943	202636
MV	0	0	-1	0	335333	1.50258	229799	328863	1.48077	223654
NOD	-1	-1	-1	0	380325	1.23482	313187	387512	1.22577	320585
NTS	1	1	-1	0	157598	0.709288	220768	149959	0.698827	213032
ORBl1	0	0	0	-1	28274.3	0.309156	91888.4	27949.4	0.316966	89190.5
ORBl2/3	-1	-1	-1	-1	83078.4	0.498138	163940	89557.3	0.514601	175234
ORBl5	-1	-1	-1	-1	212829	0.999967	214328	215399	1.01581	214637
ORBl6a	0	0	-1	0	99702.3	0.442149	226063	94473	0.430654	225948
ORBm5	-1	0	0	-1	79682.2	0.366699	217649	85005.3	0.383266	217639
ORBvl1	0	1	0	-1	39535	0.30052	130937	38003.8	0.317383	123009
ORBvl2/3	-1	-1	-1	-1	73455.1	0.413002	174253	81070.4	0.441685	182322
ORBvl5	0	0	0	-1	117908	0.510983	227372	117053	0.519067	223972
OT	1	0	-1	1	688401	3.23037	213077	662010	3.16596	209592
PA	1	0	-1	1	187923	0.86846	217129	178385	0.835738	212992
PAA	-1	0	-1	-1	117202	0.932013	124529	117288	0.956767	123625
PAG	1	0	-1	0	780656	3.87914	198978	752278	3.86542	197340
PAR	1	0	-1	0	194413	1.04296	186469	188835	1.02959	182550
PB	-1	-1	-1	-1	184444	0.932458	193375	186419	0.94361	194748
PCG	1	1	0	-1	108927	0.475245	229868	104054	0.479585	214983
PERI	1	1	0	-1	76297.4	0.664405	116230	73983.8	0.670263	111207
PF	0	1	-1	-1	81518.4	0.395626	201668	77286.8	0.399129	198590
PFL	0	0	-1	0	1.23083e+06	4.76343	262603	1.21076e+06	4.67772	261982
PG	0	-1	-1	1	180039	0.760304	241392	176948	0.736873	242654
PH	1	1	0	0	139610	0.591302	236959	129925	0.586176	221373
PIR	1	0	-1	-1	1.57484e+06	9.41094	166120	1.52328e+06	9.4902	161770
PL2/3	-1	-1	0	-1	66797.5	0.339567	197395	69152.2	0.34515	198153
PL5	-1	-1	0	-1	157442	0.769601	202083	165230	0.807556	203345
PL6a	-1	-1	0	-1	103215	0.386482	257923	103588	0.39116	266908
PO	-1	-1	-1	-1	166278	0.977436	167018	166411	0.988215	167457
POST	1	0	-1	1	233850	0.955894	244111	220688	0.93621	237508
PPN	0	0	0	0	140175	0.776095	168480	109480	0.756135	143393
PRE	0	0	-1	0	185439	0.818944	226088	182456	0.815994	223842
PRM	-1	-1	-1	0	1.10304e+06	4.34231	254457	1.10411e+06	4.32317	257465
PRNc	-1	-1	-1	1	339872	1.88657	174869	352883	1.81417	189029
PRNr	0	0	0	1	379792	1.91675	194313	313205	1.86561	161509
PSV	0	0	-1	0	184765	0.916113	201117	182468	0.897817	194419
PYR	0	0	-1	0	350828	1.20224	293115	341381	1.19419	289617
ProS	1	1	-1	0	156646	1.10236	143118	151205	1.09858	135940
RE					86714.5	0.347341	250172	82462.8	0.358762	233374
RSPagl1	1	1	-1	0	70245.5	0.631455	111631	65982.4	0.625228	104852
RSPagl2/3	-1	0	-1	-1	177434	0.552716	320061	179534	0.567037	318776
RSPagl5	-1	0	-1	-1	156631	0.609421	262150	158888	0.626771	256433
RSPagl6a	0	-1	-1	-1	95971.1	0.339727	282321	94089	0.340154	282676
RSPd2/3	0	0	-1	-1	258670	0.845011	306314	254556	0.853186	295883
RSPd5	-1	0	-1	-1	247614	0.997455	248214	249462	1.01605	241307
RSPd6a	0	-1	-1	0	158789	0.633089	254484	155226	0.627771	254504
RSPv2/3	0	0	-1	0	349155	0.871156	394790	342018	0.869378	391578
RSPv5	0	0	-1	-1	353308	1.35462	260561	349983	1.37869	252492
RSPv6a	0	0	-1	-1	135902	0.532901	257461	134171	0.535613	257301
RT	0	0	-1	0	255491	1.37172	182691	239117	1.36986	175409
SCdg	-1	-1	-1	0	199552	0.965822	205204	200678	0.960616	207199
SCig	-1	-1	-1	0	457043	1.72526	267802	466978	1.72124	277574
SCiw	-1	-1	-1	0	395282	1.69783	235837	401965	1.67788	240970
SCop	0	-1	-1	0	154520	0.542953	285169	149937	0.540041	286965
SCsg	1	0	-1	1	311426	0.989626	319379	299047	0.953693	314446
SCzo	1	0	-1	1	80109.7	0.480282	168866	76120.9	0.458598	165398
SF	1	1	0	0	60557.1	0.422688	141990	54779.2	0.42257	133237
SI	0	0	0	-1	562750	2.68659	201605	509566	2.72184	189487
SIM	-1	-1	-1	-1	1.18046e+06	4.91953	241212	1.2116e+06	4.96925	243923
SNr	0	0	0	0	201306	1.28989	153579	190240	1.27047	147541
SOC	-1	-1	-1	0	133037	0.684247	191306	145462	0.651325	217632
SPVC	0	0	-1	0	316506	1.52738	204987	303120	1.50437	203912
SSp-bfd2/3	-1	0	0	-1	304224	1.22432	249706	313453	1.25972	244991
SSp-bfd4	0	0	-1	-1	422204	1.09663	381984	421116	1.11722	376611
SSp-bfd5	0	1	-1	-1	216446	0.959788	229433	214048	0.971794	221073
SSp-bfd6a	0	0	-1	-1	315885	1.09722	282047	309260	1.10502	279831
SSp-ll2/3	0	0	-1	-1	127818	0.502792	251961	126962	0.520306	243273
SSp-ll5	1	1	-1	0	104511	0.458982	228341	100693	0.45345	217165
SSp-ll6a	1	0	-1	-1	124627	0.457454	270275	117735	0.458649	267095
SSp-m2/3	0	0	-1	-1	282304	1.23582	226841	278042	1.23665	224255
SSp-m4	-1	-1	-1	0	282647	0.811852	351070	284778	0.808164	351460
SSp-m5	0	1	-1	-1	228615	1.03169	222403	227974	1.04351	217608
SSp-m6a	0	0	-1	-1	344837	1.37089	245428	334775	1.38831	242570
SSp-n2/3	-1	-1	0	-1	128532	0.533495	238553	135522	0.566467	239329
SSp-n4	-1	0	-1	-1	177319	0.474741	372214	185727	0.501521	369006
SSp-n5	0	1	0	-1	105708	0.461355	231729	103429	0.468363	222421
SSp-n6a	0	-1	-1	0	177488	0.676192	257128	174690	0.674455	257373
SSp-tr2/3	-1	0	-1	-1	91029.8	0.333098	275498	93010.2	0.346618	270040
SSp-ul2/3	-1	1	0	-1	189969	0.775765	246985	194530	0.810858	237036
SSp-ul4	0	0	-1	-1	170139	0.439249	383283	168787	0.45326	374902
SSp-ul5	0	1	-1	-1	146930	0.646864	227435	145902	0.67063	217771
SSp-ul6a	0	0	-1	-1	206098	0.81461	253689	204960	0.84657	247798
SSp-un	0	0	0	-1	256011	1.07244	241541	255385	1.08905	234687
SSs2/3	0	1	0	-1	366207	1.67907	217481	362471	1.7129	211187
SSs4	-1	0	-1	-1	283469	0.932156	305757	286750	0.93936	304695
SSs5	0	1	0	-1	402845	1.77896	226184	395806	1.82454	218540
SSs6a	0	1	-1	-1	453213	1.69804	266183	441432	1.72162	256999
SUB	0	0	-1	0	362955	1.88244	191494	354972	1.87781	186618
TEa2/3	0	1	0	-1	117446	0.533047	219862	116272	0.54876	213023
TEa5	0	1	0	-1	171009	0.737049	230007	166740	0.738385	224046
TEa6a	0	1	0	-1	115225	0.418226	276868	113955	0.41985	269261
TR	-1	0	-1	-1	126800	1.14949	109794	126928	1.19268	105164
TTd	-1	0	0	-1	89132.7	0.586853	149738	91849.3	0.618207	147710
TTv	-1	0	-1	-1	61971.2	0.549235	113516	62305.9	0.561837	111016
TU	1	1	0	1	88044.2	0.447911	194720	58711	0.418699	137476
UVU	0	0	-1	0	609592	2.1501	286247	609086	2.12121	284956
VAL	0	0	0	-1	111682	0.669536	165628	110671	0.681142	165128
VCO	-1	-1	-1	-1	163554	0.854976	184027	167364	0.861232	201461
VII	0	0	0	1	102513	0.743057	132778	89688.9	0.687965	129026
VISC2/3	0	0	0	-1	82099.4	0.436729	190624	81918	0.437675	184773
VISC5	-1	1	-1	-1	111093	0.569069	198377	111620	0.574791	192042
VISC6a	0	0	0	-1	104984	0.437915	239937	103258	0.445062	232442
VISa2/3	-1	0	-1	-1	93975.7	0.339106	275024	94778	0.349123	270913
VISal	0	-1	0	0	147767	0.628757	236493	147279	0.623254	237203
VISam	-1	0	-1	-1	157653	0.666299	236217	159953	0.676069	235428
VISl	0	0	0	0	251552	1.05594	237247	249458	1.04701	236962
VISli	0	0	0	0	96753.2	0.409377	239062	95631.8	0.407314	237338
VISp2/3	-1	0	-1	0	497727	1.64731	303187	497899	1.61515	299369
VISp4	0	0	-1	0	308424	0.831158	371615	305198	0.819954	363381
VISp5	0	0	-1	0	344781	1.29595	264216	337001	1.29006	259305
VISp6a	1	0	-1	0	280436	0.865588	316286	268160	0.855628	315832
VISpl	1	0	0	1	182319	0.793952	229227	174094	0.774602	226231
VISpm	0	0	-1	0	220357	0.913255	243822	220280	0.908506	240473
VISpor2/3	0	1	0	-1	74640.7	0.296026	252186	72872.3	0.299824	244587
VISpor5	0	0	0	0	75309.6	0.307589	239703	72707.3	0.307162	237997
VISrl	0	0	0	-1	199390	0.848923	237161	198775	0.856172	231278
VM	0	0	0	-1	132879	0.759605	172379	122303	0.7712	164045
VMH	1	1	0	1	104316	0.433446	241537	93786	0.423266	222943
VPL	0	1	0	-1	142546	0.785269	185162	128859	0.799422	163631
VPM	-1	-1	-1	-1	286018	1.30419	222459	300645	1.34235	223757
ZI	0	0	0	0	334831	1.49023	226952	305955	1.48242	205015

## Sheet: Fig 4B CD1
Supplemntary table: Table showing median values per region for cell count, volume and cell density for male and female FVB.CD1. Related to Figure 4B.
Region	FVB.CD1_male_vs_female_count3d_ranksum_qval	FVB.CD1_male_vs_female_density3d_ranksum_qval	FVB.CD1_male_vs_female_coverage_ranksum_qval	FVB.CD1_male_vs_female_volume_ranksum_qval	Count_males	Volume_males(mm^3)	Density_males(cells/mm^3)	Count_females	Volume_females(mm^3)	Density_females(cells/mm^3)
AAA	0	0	0	0	90430.8	0.407918	219875	80949	0.405196	192270
ACAd2/3	0	0	0	0	116531	0.524164	227470	110288	0.510854	211266
ACAd5	0	0	-1	-1	224720	0.958261	233906	219302	0.966039	227618
ACAd6a	0	0	0	-1	165929	0.606051	283973	159165	0.608535	268505
ACAv5	0	0	0	0	221111	0.817467	275598	217686	0.817141	266551
ACB	0	0	0	0	1.19845e+06	3.78202	314785	1.12886e+06	3.77349	290544
AHN	0	0	0	0	155315	0.619398	242144	131747	0.583773	217469
AId2/3	0	1	0	-1	130654	0.795214	167068	114778	0.79884	149941
AId5	0	0	0	-1	279063	1.27836	205228	241809	1.28493	190256
AId6a	0	0	0	0	187795	0.703769	282087	160259	0.695464	236051
AIp2/3	0	0	0	-1	114623	0.6949	166200	106520	0.726498	150621
AIp5	0	0	0	0	123276	0.686633	180411	110414	0.683397	166694
AIp6a	0	1	0	-1	77999.9	0.351232	225164	69175.2	0.357567	200477
AIv2/3	0	1	0	0	85332.8	0.565408	149046	77136.3	0.558936	134971
AIv5	0	1	0	-1	132860	0.645966	200567	117068	0.653354	178662
AM	0	0	-1	-1	63745.4	0.342501	189073	60130.9	0.353239	167562
ANcr1	0	0	0	0	1.521e+06	6.02466	256972	1.51257e+06	5.83287	254374
ANcr2	0	0	-1	0	1.28544e+06	5.16384	252008	1.2023e+06	4.87043	245831
AOB	0	0	0	0	124357	0.616638	198037	101168	0.598211	175120
AON	1	1	0	0	901299	4.10869	223311	713404	4.00413	171291
APN	0	0	0	0	261076	1.08026	245359	230001	1.07141	213560
APr	0	0	-1	0	71691.8	0.344985	212640	70675.7	0.34062	208091
AUDd	0	0	0	-1	244233	1.04778	246448	238398	1.05237	229625
AUDp2/3	0	1	0	-1	109525	0.396867	290350	103580	0.409461	256198
AUDp5	0	0	0	0	157166	0.609563	266708	150552	0.60141	253254
AUDpo	0	0	-1	0	141111	0.540471	270618	130809	0.539041	245618
AUDv2/3	0	1	0	-1	80312.2	0.334323	247334	72996.2	0.344759	216367
AUDv5	0	0	0	0	131241	0.535955	254587	127693	0.532656	237007
AV	0	0	-1	-1	101220	0.38771	271605	99871	0.390595	258551
BLAa	0	0	0	0	117162	0.635303	194749	111357	0.632494	176319
BLAp	0	0	0	0	100998	0.599754	174022	93062.8	0.593168	155268
BLAv	0	0	0	0	43069.1	0.346716	126919	39817.8	0.339704	116156
BMAa	0	0	0	0	135430	0.622283	219596	126617	0.592855	206059
BMAp	0	0	0	0	121088	0.622383	198499	111424	0.605649	180527
BST	1	0	-1	1	285093	1.27881	225343	251685	1.12423	218488
CA1	0	0	-1	0	1.52798e+06	9.67735	166300	1.48083e+06	9.25856	161899
CA2	0	0	-1	0	74763.3	0.516788	150037	73611.1	0.493103	148795
CA3	0	0	-1	0	1.00379e+06	6.04177	172789	974055	5.74195	172286
CEAm	0	0	0	1	134899	0.675168	202822	123727	0.631302	189129
CENT2	0	0	-1	-1	504638	1.68202	304458	500241	1.68975	284835
CENT3	0	-1	0	0	773435	2.9639	261227	770672	2.96205	262843
CL	0	0	0	-1	72228.7	0.319182	224900	60051.9	0.321779	198162
CLA	0	0	0	-1	102849	0.407379	260590	96565.3	0.409198	244114
COAa	0	0	0	0	120558	0.651159	188015	107935	0.633572	178099
COApl	0	0	0	0	149879	1.1105	139618	136031	1.06051	128325
COApm	0	0	0	0	196071	1.2843	155373	177453	1.21797	149237
COPY	-1	0	-1	-1	686213	2.53073	277771	701513	2.53098	269396
CP	0	0	-1	0	5.16905e+06	24.2221	221159	5.00295e+06	24.1497	209943
CUL4, 5	-1	0	0	-1	1.77447e+06	7.15811	252252	1.79614e+06	7.1623	250515
CUN	0	0	0	0	84549.3	0.518168	161861	71019.3	0.509236	138889
DCN					74571	0.388638	183495	77786.2	0.396892	205619
DCO	0	0	0	0	119041	0.559977	219997	106594	0.546216	191899
DEC	-1	0	0	-1	877115	3.73949	234168	885332	3.91375	228767
DG-mo	0	0	-1	0	288353	3.76263	77130	265391	3.63247	73179.3
DG-po	0	0	-1	0	82244	0.463851	185214	80010	0.461924	172849
DG-sg	0	0	-1	0	1.21709e+06	1.8724	656609	1.18585e+06	1.8361	644704
DP	0	0	0	-1	73479.8	0.410289	175844	67742.8	0.410527	163367
ECT2/3	0	1	0	-1	81060.7	0.415683	199411	73239.1	0.443079	170292
ECT5	0	1	0	-1	94207.2	0.448423	211635	86229.2	0.451709	190192
ECT6a	0	0	0	0	78940.5	0.332291	249032	72167.8	0.32504	218445
ENTl2	1	1	0	0	180985	1.28877	141768	157795	1.28642	120949
ENTl3	1	1	0	-1	147044	1.00515	151567	128479	1.00958	122593
ENTl5	1	1	0	0	177314	1.16539	152892	151902	1.1487	129844
ENTl6a	0	1	0	0	175285	0.883449	206727	158079	0.869387	176787
ENTm1	0	0	0	-1	155932	1.84185	87386.2	151955	1.84644	81488.8
ENTm2	0	0	0	0	278657	1.18323	235535	266631	1.17894	221493
ENTm3	0	0	0	0	223555	0.895817	256249	206185	0.871457	228650
ENTm5	0	0	0	0	224653	0.841452	272842	207909	0.816088	253551
ENTm6	0	0	0	0	138127	0.567817	247121	122390	0.567641	220774
EPI	0	0	0	0	176218	0.58233	307033	160904	0.575092	261442
EPd	0	1	0	-1	280620	1.47944	197092	238981	1.48274	159699
EPv	0	1	0	-1	100630	0.846294	122872	85038.5	0.847887	99707.3
FL	-1	-1	-1	0	342498	1.35425	250874	345957	1.34615	250980
FOTU	-1	0	0	-1	271571	1.0844	253145	276283	1.09779	248722
FRP	-1	0	0	-1	129966	0.781717	173014	134842	0.821017	163937
FS	0	0	0	0	95725.3	0.381764	247565	83975.3	0.380685	219785
GPe	-1	-1	-1	-1	224237	1.56671	137317	227590	1.59246	138147
GU2/3	0	0	-1	-1	73603	0.333118	225442	71704.1	0.345437	205552
GU5	0	1	0	-1	112561	0.457455	253357	107748	0.468631	228747
GU6a	0	1	0	-1	100778	0.338839	292069	89345.4	0.356162	255546
HATA	0	0	-1	0	97024.9	0.483755	205719	96324.8	0.475933	202626
ICc	0	0	0	0	283699	1.00844	285251	271280	0.978344	274308
ICd	0	0	-1	0	323436	1.19065	271450	318576	1.17263	267244
ICe	0	0	-1	0	407061	1.88776	212975	396441	1.78657	206572
ILA	0	0	0	-1	159231	0.69697	234286	152371	0.71068	225135
IP	0	0	0	0	163157	0.759614	223136	132176	0.745891	189930
LA	0	1	0	0	141607	0.643532	218609	128418	0.640296	200387
LD	0	0	-1	0	154356	0.834954	190262	146993	0.820026	177715
LGd-co	0	0	0	0	83293.9	0.371001	232580	70393.6	0.363625	180884
LGv	0	0	0	0	70271.1	0.364993	194753	68588.6	0.358783	170870
LP	0	0	0	0	229711	1.09834	228275	185102	1.06772	173398
LPO	0	0	0	0	114129	0.552061	195431	92149.7	0.525945	170869
LSr	0	0	0	0	352021	1.60272	229698	317876	1.58783	196058
LSv	0	0	-1	0	164124	0.543481	307434	154884	0.506539	287594
MA					80399.1	0.339303	246370	83949.9	0.330208	302559
MD	0	0	-1	-1	247591	1.19406	211509	228869	1.21288	195853
MDRNd					195423	0.987439	202950	194538	1.01121	192576
MEA	1	0	0	1	378462	1.89921	207353	339235	1.7379	189853
MG	0	0	0	-1	154630	0.633522	223356	137535	0.646442	215749
MM					123750	0.480987	261606	117817	0.483697	249116
MOB	0	0	0	-1	3.13884e+06	11.6372	282401	2.609e+06	12.3885	251217
MOp2/3	0	1	-1	-1	680208	2.92486	234900	663241	3.02456	219688
MOp5	0	0	-1	-1	577031	2.73045	214100	575316	2.74749	204587
MOp6a	0	0	0	-1	569995	2.55195	240377	552825	2.61426	214769
MOs1	0	0	-1	0	140862	2.26535	61412.2	134051	2.26191	58327.2
MOs2/3	0	1	0	-1	609715	2.93823	209674	594521	2.99853	196066
MOs5	0	0	0	-1	787001	3.71242	217444	778245	3.71417	207279
MOs6a	0	0	0	-1	536651	2.15157	256873	525006	2.22041	250626
MPN	0	0	-1	0	89620.6	0.329054	258329	74430.6	0.30433	247339
MPO	0	0	0	1	106137	0.471328	217023	83069.6	0.432944	200408
MV	0	0	-1	-1	397114	1.64457	239680	383958	1.68649	228813
NOD	-1	0	0	0	489035	1.59954	310198	491558	1.54072	309914
NTS	0	0	0	0	147892	0.747447	199678	125861	0.732381	170651
ORBl1	0	0	0	0	29421.2	0.344283	85407.7	28024.2	0.340545	81777.6
ORBl2/3	0	0	-1	0	103736	0.579859	178751	96765.7	0.570576	170837
ORBl5	0	0	0	0	270529	1.12758	250579	256039	1.1072	235875
ORBl6a	0	0	0	0	129537	0.485202	276313	114564	0.473498	237051
ORBm5	0	0	-1	-1	92535.8	0.38628	245770	90544.1	0.394471	233975
ORBvl1	0	0	0	0	37963.4	0.334699	118863	35759.6	0.326508	106028
ORBvl2/3	0	-1	-1	-1	91529.1	0.474414	185888	87058.1	0.480975	189909
ORBvl5	0	0	0	0	140020	0.563075	260696	136526	0.555975	246262
OT	0	0	0	0	763903	3.40464	225625	686042	3.33373	207669
PA	1	0	0	1	215381	0.960216	226907	194063	0.879176	217415
PAA	0	0	0	0	147993	1.06065	137832	133644	1.04307	131957
PAG	0	0	0	0	867862	4.2905	200296	741098	4.13642	177472
PAR	0	0	0	0	219568	1.17005	191798	209904	1.15584	178415
PB	0	0	0	-1	213835	0.988241	211700	191479	0.994438	184125
PCG	0	0	0	-1	109246	0.478754	226917	94079	0.481652	187478
PERI	1	1	0	-1	81836.8	0.672283	121600	71767.5	0.678505	102368
PF	0	0	0	0	95233.4	0.429532	234275	86317.9	0.429068	202174
PFL	0	0	-1	0	1.49979e+06	6.19704	253681	1.44205e+06	5.92867	246938
PG	-1	0	0	-1	197310	0.85525	228032	208043	0.887902	227279
PH	0	0	-1	0	143176	0.630562	230840	128239	0.614129	206014
PIR	1	1	0	0	1.76984e+06	10.0805	178851	1.6224e+06	9.84086	165357
PL2/3	0	0	0	-1	70390.5	0.338111	208837	67541.3	0.345148	193930
PL5	0	0	0	-1	171218	0.773915	225703	165078	0.80836	216815
PL6a	0	0	0	0	120205	0.414128	292333	106327	0.413463	258750
PO	0	0	0	0	222964	1.01535	216544	188547	1.00844	195628
POST	0	0	-1	0	255885	1.08405	250498	249491	1.04089	232788
PPN					113601	0.831065	144239	128162	0.824279	159886
PRE	0	0	0	0	207918	0.943409	215587	196028	0.930846	207952
PRM	-1	0	-1	0	1.14996e+06	4.96494	242530	1.18876e+06	4.82796	237360
PRNc					211249	1.94372	103538	403556	1.97857	202648
PRNr					221994	1.97811	116496	393277	2.01171	202199
PSV					214567	0.981305	215606	200894	1.0017	199759
PYR	0	0	0	0	325337	1.27164	265203	316567	1.22654	257635
ProS	0	0	0	0	169350	1.20386	144285	162886	1.19477	137458
RE					98005.2	0.389943	257570	93414.8	0.37775	244578
RSPagl1	0	0	0	0	70506.9	0.667266	107625	68503	0.650256	101765
RSPagl2/3	0	0	-1	0	204714	0.596467	351793	196980	0.580298	333528
RSPagl5	0	0	-1	0	190699	0.665258	294190	185853	0.649428	285201
RSPagl6a	-1	0	-1	0	110534	0.377324	319973	116527	0.37489	311182
RSPd2/3	0	0	-1	0	303798	0.932571	323369	290305	0.900584	318582
RSPd5	0	0	-1	0	290005	1.10412	266189	284246	1.08344	263474
RSPd6a	-1	0	-1	0	176192	0.684652	278926	184950	0.680851	266951
RSPv2/3	-1	-1	-1	0	347343	0.976601	359340	349659	0.950258	373975
RSPv5	-1	0	-1	0	377016	1.49364	263991	377232	1.46308	261360
RSPv6a	-1	0	-1	0	135384	0.575795	268952	145955	0.57503	251973
RT	0	0	0	0	273572	1.47495	176500	248264	1.47462	161469
SCdg	0	0	-1	0	207929	1.06458	191729	193198	1.02399	185363
SCig	0	0	0	0	498867	1.90807	265980	470787	1.81749	258489
SCiw	0	0	-1	0	415837	1.80927	236605	388599	1.73847	220064
SCop	0	-1	-1	0	186336	0.629031	279074	171333	0.618294	279306
SCsg	0	0	0	0	340722	1.14386	321131	336470	1.12362	305804
SCzo	0	0	-1	0	82427.5	0.518444	159655	74158.3	0.499941	147921
SF	0	0	0	-1	67789.1	0.426358	148423	50992.7	0.444283	114172
SI	0	0	0	0	621219	2.92562	210713	558042	2.89345	190099
SIM	0	0	0	0	1.43894e+06	6.22273	238230	1.41893e+06	5.88403	234393
SNr	0	0	0	0	226210	1.35745	168798	216355	1.30912	154004
SOC					150893	0.749027	198966	166313	0.76191	223388
SPVC					310597	1.62518	183436	321389	1.6549	195795
SSp-bfd2/3	0	0	-1	0	352852	1.32324	274076	347817	1.30919	267060
SSp-bfd4	0	0	-1	0	505939	1.27166	409240	487297	1.21742	392897
SSp-bfd5	0	0	-1	0	256980	1.06341	251922	251066	1.03833	245881
SSp-bfd6a	-1	0	-1	0	342971	1.16647	312224	349073	1.14617	288447
SSp-ll2/3	-1	0	-1	-1	142858	0.533296	278929	151136	0.550569	265625
SSp-ll5	0	0	-1	-1	114995	0.465207	245748	111490	0.480699	233624
SSp-ll6a	0	0	0	0	128467	0.476572	291039	126461	0.467402	265683
SSp-m2/3	0	0	-1	-1	337054	1.28408	261726	321103	1.30892	245923
SSp-m4	0	0	-1	0	348076	0.902917	382546	340656	0.899907	376210
SSp-m5	0	0	-1	-1	289795	1.14778	252484	275246	1.15309	244591
SSp-m6a	0	0	-1	-1	410495	1.47743	285141	342087	1.48242	233598
SSp-n2/3	-1	0	-1	-1	145645	0.553165	263185	146822	0.572897	254836
SSp-n4	0	0	-1	-1	216571	0.535503	402015	213798	0.545564	386780
SSp-n5	0	0	-1	0	131362	0.507681	256658	122276	0.4989	246683
SSp-n6a	0	0	0	0	202339	0.7342	289888	199130	0.728581	264070
SSp-tr2/3	0	0	-1	-1	105720	0.357353	294910	103325	0.360715	283886
SSp-ul2/3	-1	0	-1	-1	210754	0.781842	275821	219829	0.826085	262662
SSp-ul4	0	0	-1	-1	201209	0.48455	410903	199921	0.489743	395000
SSp-ul5	0	0	-1	-1	166770	0.684978	245566	164250	0.685429	236854
SSp-ul6a	0	0	-1	0	204331	0.81827	269430	204189	0.817768	242633
SSp-un	0	0	-1	0	286922	1.13729	260265	286077	1.12841	251111
SSs2/3	0	0	-1	-1	409940	1.71037	241971	391580	1.75201	227192
SSs4	0	0	-1	-1	324165	0.988894	333827	321796	0.989972	316447
SSs5	-1	0	-1	-1	460759	1.89989	252202	468611	1.95646	240986
SSs6a	0	0	0	-1	536329	1.82161	301727	482815	1.86552	262474
SUB	0	0	-1	0	409102	2.12872	199135	395573	2.06676	191656
TEa2/3	0	1	0	-1	142753	0.5987	240407	135458	0.62212	222481
TEa5	0	1	0	-1	211395	0.835154	255985	198922	0.844337	235290
TEa6a	0	0	0	-1	141027	0.46049	310943	132009	0.465784	278180
TR	0	0	0	-1	143251	1.26689	115916	136665	1.27174	107469
TTd	0	0	0	-1	96627.9	0.611896	165743	90465.1	0.61576	149604
TTv	1	1	0	0	70787.3	0.589693	121671	54998.3	0.567641	94952.9
TU					72851	0.474502	156865	73670.5	0.430585	162783
UVU	0	0	0	0	603354	2.4104	257206	589247	2.33919	251052
VAL	0	0	0	-1	123966	0.7127	173194	111691	0.71995	150038
VCO					186215	0.936184	192484	194221	0.917067	220639
VII					104535	0.762374	135418	127889	0.774993	170495
VISC2/3	0	0	-1	0	97248.8	0.460741	210414	90953.4	0.458546	195303
VISC5	0	0	-1	-1	138721	0.618394	227365	133970	0.621944	213267
VISC6a	0	1	0	-1	129780	0.448047	288988	119625	0.463426	260226
VISa2/3	-1	0	-1	-1	105295	0.351357	293680	105852	0.358056	292992
VISal	0	0	-1	0	173528	0.690321	262910	168480	0.680086	249784
VISam	0	0	-1	0	186223	0.743182	276542	182473	0.731353	256529
VISl	0	0	0	0	306364	1.22234	264059	305880	1.18182	256806
VISli	0	0	-1	0	118725	0.456677	266343	113534	0.448235	251680
VISp2/3	-1	0	0	0	561101	1.76311	336025	567904	1.73908	319433
VISp4	0	0	0	0	376370	0.951111	401772	371419	0.931078	392017
VISp5	0	0	-1	0	403171	1.44587	291916	399067	1.39686	284550
VISp6a	0	0	-1	0	336089	0.973841	354100	321315	0.972411	338187
VISpl	0	0	0	0	209743	0.884778	242460	202059	0.879084	227854
VISpm	-1	0	-1	0	257306	0.977755	277223	257753	0.965612	266843
VISpor2/3	0	0	0	0	87393.4	0.322205	277404	82102.1	0.317012	263289
VISpor5	0	0	0	-1	91401.6	0.345462	262413	86368.6	0.345901	246661
VISrl	0	0	-1	0	224496	0.925672	258186	219289	0.905338	247088
VM	0	0	0	-1	153809	0.818559	186164	140520	0.836058	169362
VMH	0	0	0	0	114702	0.465157	242007	103443	0.447507	223515
VPL	-1	0	0	-1	137054	0.817794	168806	142388	0.848551	157749
VPM	0	0	0	-1	368824	1.43167	255977	320947	1.46732	212684
ZI	0	0	0	0	334569	1.5676	220934	318159	1.54886	195957
