# Supplementary material for: Sex, strain, and lateral differences in brain cytoarchitecture across a large mouse population
Source: eLife. 2023 May 5;12:e82376. doi: 10.7554/eLife.82376 (PMC10212558; doi:10.7554/eLife.82376)
Supplement: Figure 5—source data 1. [file elife-82376-fig5-data1.xlsx]

## Sheet: Fig 5A volume_weight
Supplemntary table: Table showing Volume and body weight for each mice in the study. Related to Figure 5A.
Experiment_id	Volume(mm^3)	Weight(gr)	strain	Sex
100140949	382.116	24.8	C57BL/6J	M
100141219	392.466	23.6	C57BL/6J	M
100141222	401.221	24.7	C57BL/6J	M
100141223	386.86	25.3	C57BL/6J	M
100141273	397.18	25	C57BL/6J	M
100141434	362.109	22	C57BL/6J	M
100141435	377.977	21.2	C57BL/6J	M
100141454	398.327	24.9	C57BL/6J	M
100141473	387.734	24.8	C57BL/6J	M
100141495	375.77	21.8	C57BL/6J	M
100141563	381.574	24.6	C57BL/6J	M
100141596	395.708	25	C57BL/6J	M
100142569	376.854	24.8	C57BL/6J	M
100142580	374.526	25	C57BL/6J	M
100142655	395.947	26.5	C57BL/6J	M
100147785	372.343	21.6	C57BL/6J	M
100147853	380.841	24.7	C57BL/6J	M
100147861	366.708	23.3	C57BL/6J	M
100148142	385.057	24.5	C57BL/6J	M
100148143	377.571	23.1	C57BL/6J	M
100148443	367.031	23.8	C57BL/6J	M
100148503	385.69	20.5	C57BL/6J	M
100148554	365.318	21.3	C57BL/6J	M
112162251	370.054	25.8	C57BL/6J	M
112167395	380.277	27	C57BL/6J	M
112229103	378.748	26.5	C57BL/6J	M
112229814	387.792	26.9	C57BL/6J	M
112306316	372.759	24.9	C57BL/6J	M
112307754	375.08	27.7	C57BL/6J	M
112308468	373.358	28.6	C57BL/6J	M
112372418	390.681	25.5	C57BL/6J	M
112373124	379.503	23.6	C57BL/6J	M
112373830	370.838	23.7	C57BL/6J	M
112423392	379.363	24.5	C57BL/6J	M
112424102	370.455	22.5	C57BL/6J	M
112424813	380.068	25.2	C57BL/6J	M
112458114	370.573	25.2	C57BL/6J	M
112458831	382.285	24.4	C57BL/6J	M
112459547	372.417	24.7	C57BL/6J	M
112460257	384.031	22.7	C57BL/6J	M
112597496	371.36	23.2	C57BL/6J	M
112745073	368.848	21.2	C57BL/6J	M
112745787	372.261	23.2	C57BL/6J	M
112789899	378.861	24.6	C57BL/6J	M
112791318	349.926	21.3	C57BL/6J	M
112826458	408.863	28.5	C57BL/6J	M
112827164	398.245	25.8	C57BL/6J	M
112827872	391.423	23.8	C57BL/6J	M
112882565	393.808	25	C57BL/6J	M
112935169	373.005	23.6	C57BL/6J	M
112936582	395.633	26.3	C57BL/6J	M
113095845	398.862	26.3	C57BL/6J	M
113096571	375.341	24.6	C57BL/6J	M
113166056	394.355	26.9	C57BL/6J	M
113313632	384.576	27.2	C57BL/6J	M
113368085	377.578	25.3	C57BL/6J	M
113368898	386.271	20.7	C57BL/6J	F
113369603	408.233	24.5	C57BL/6J	M
113400134	386.113	25	C57BL/6J	M
113442864	370.387	23	C57BL/6J	M
113443572	381.525	25.5	C57BL/6J	M
113504763	387.487	25.1	C57BL/6J	M
113505468	400.702	25.6	C57BL/6J	M
113553300	380.37	24.3	C57BL/6J	M
113554719	376.869		C57BL/6J	M
113696423	385.077	25.8	C57BL/6J	M
113766038	387.866	26.4	C57BL/6J	M
113766744	389.17	27.5	C57BL/6J	M
113783321	372.034	21.9	C57BL/6J	M
113784293	384.114	24.5	C57BL/6J	M
113846682	390.135	25.7	C57BL/6J	M
113884251	396.294	24.4	C57BL/6J	M
113887162	380.145	26.2	C57BL/6J	M
113933871	379.083	24.7	C57BL/6J	M
113935285	370.775	25.2	C57BL/6J	M
114008220	362.153	23.9	C57BL/6J	M
114008926	369.095	27.1	C57BL/6J	M
114045733	367.864	25.7	C57BL/6J	M
114046440	364.838	26.7	C57BL/6J	M
114047146	377.158	19.7	C57BL/6J	F
114155923	378.508	25.1	C57BL/6J	M
114249084	372.777	22.5	C57BL/6J	M
114250546	381.712	26.1	C57BL/6J	M
114290938	366.324	23.5	C57BL/6J	M
114292355	379.889	25	C57BL/6J	M
114399224	360.804	23.3	C57BL/6J	M
114399934	377.267	24	C57BL/6J	M
114400640	369.878	24.4	C57BL/6J	M
114427219	368.931	26.5	C57BL/6J	M
114428632	399.362	20.5	C57BL/6J	F
114429338	367.588	27.1	C57BL/6J	M
114472860	369.119	23.9	C57BL/6J	M
114473794	376.661	24.6	C57BL/6J	M
114754390	372.549	23.4	C57BL/6J	M
114755099	369.603	24.1	C57BL/6J	M
116900714	392.47	25.2	C57BL/6J	M
116903230	385.537	23.7	C57BL/6J	M
116903968	387.666	26.5	C57BL/6J	M
116904684	374.173	25.6	C57BL/6J	M
117298988	391.556	28.1	C57BL/6J	M
117302771	390.188	26.6	C57BL/6J	M
117312486	367.926	22.3	C57BL/6J	M
117316260	370.471	24.2	C57BL/6J	M
119846129	376.308	25	C57BL/6J	M
119846838	381.605	25.5	C57BL/6J	M
119847544	376.09	26.1	C57BL/6J	M
119848249	368.038	23.4	C57BL/6J	M
120280191	369.591	25.5	C57BL/6J	M
120280939	389.066	25.5	C57BL/6J	M
120282354	400.628	26	C57BL/6J	M
120436274	389.358	23.4	C57BL/6J	M
120436988	371.397	25	C57BL/6J	M
120437703	374.658	26.1	C57BL/6J	M
120438416	367.451	21.1	C57BL/6J	M
120491896	364.152	22.3	C57BL/6J	M
120493315	388.458	24.2	C57BL/6J	M
120494024	432.142	29.1	C57BL/6J	M
120494729	404.88	28.5	C57BL/6J	M
120570964	381.838	24.8	C57BL/6J	M
120571672	405.267	25.1	C57BL/6J	M
120572378	393.181	28.7	C57BL/6J	M
120760759	400.353	27	C57BL/6J	M
120761491	426.039	28.5	C57BL/6J	M
120762196	389.213	26.7	C57BL/6J	M
120811946	398.142	27.6	C57BL/6J	M
120812686	372.279	23.5	C57BL/6J	M
120875111	379.687	25.5	C57BL/6J	M
121145045	368.918	24.3	C57BL/6J	M
121145750	380.385	24.3	C57BL/6J	M
121146455	407.174	25.6	C57BL/6J	M
121509005	386.712	24.9	C57BL/6J	M
121509711	395.393	24.7	C57BL/6J	M
122640358	349.656	26.1	C57BL/6J	M
122641784	395.375	26.7	C57BL/6J	M
122642490	410.9	25.6	C57BL/6J	M
123662982	393.285	24.7	C57BL/6J	M
123663689	347.05	22.4	C57BL/6J	M
123664417	369.02	26.6	C57BL/6J	M
124059700	368.942	23.6	C57BL/6J	M
124060405	399.365	25.7	C57BL/6J	M
125361005	388.898	24.4	C57BL/6J	M
125363160	374.105	26.1	C57BL/6J	M
125435783	365.325	20.1	C57BL/6J	F
125436508	383.356	24.5	C57BL/6J	M
125437216	384.793	23.2	C57BL/6J	M
125437921	386.994	23	C57BL/6J	M
125801033	367.904	20.5	C57BL/6J	F
125801739	370.988	26.3	C57BL/6J	M
125802444	363.326	22.1	C57BL/6J	M
126190033	397.07	21	C57BL/6J	F
126353451	364.597	20.2	C57BL/6J	F
127140981	386.871	19.76	C57BL/6J	F
128003477	376.292	17.58	C57BL/6J	F
147633169	412.407	21.5	C57BL/6J	F
147708352	410.365	21.5	C57BL/6J	F
155736539	355.881	18.7	C57BL/6J	F
156252954	382.406	21	C57BL/6J	F
156254369	385.313	18.3	C57BL/6J	F
156315468	372.331	20.3	C57BL/6J	F
156394513	400.512		C57BL/6J	F
156492394	395.82	18.9	C57BL/6J	F
156493815	378.171	19.6	C57BL/6J	F
156494530	378.769	18.3	C57BL/6J	F
156546627	395.496	19.9	C57BL/6J	F
157711043	367.437	20.3	C57BL/6J	F
157909001	368.363	21.9	C57BL/6J	F
157911832	405.585	20	C57BL/6J	F
158017916	396.878	19.9	C57BL/6J	F
158019342	378.788	20.8	C57BL/6J	F
158020947	341.858	18.8	C57BL/6J	F
158139883	380.169	20.5	C57BL/6J	F
158255941	377.575		C57BL/6J	F
159209586	368.393	20.5	C57BL/6J	F
159223001	405.608	20.5	C57BL/6J	F
159224478	326.887	20.2	C57BL/6J	F
159319654	352.309	19.7	C57BL/6J	F
159329308	396.486	18.5	C57BL/6J	F
159330754	406.962	21.3	C57BL/6J	F
159373612	380.52	18.8	C57BL/6J	F
159550125	380.115	18.8	C57BL/6J	F
159602279	371.195	18.3	C57BL/6J	F
159651060	404.908	19.5	C57BL/6J	F
159651770	370.253	17.1	C57BL/6J	F
159941339	389.895	17.7	C57BL/6J	F
160150861	374.81	18.5	C57BL/6J	F
160153696	360.539	18.5	C57BL/6J	F
160537018	404.577	18.6	C57BL/6J	F
160537796	395.498	20.5	C57BL/6J	F
160540013	372.88	19.2	C57BL/6J	F
160540751	363.893	19.4	C57BL/6J	F
161463521	377.392	21.4	C57BL/6J	F
162018169	391.135	20.9	C57BL/6J	F
166271142	345.802	18.3	C57BL/6J	F
166460484	386.491	18.3	C57BL/6J	F
166461193	378.358	20	C57BL/6J	F
166461899	384.418	20.3	C57BL/6J	F
166533924	355.087	20.3	C57BL/6J	F
167026321	400.561		C57BL/6J	M
167117360	408.97	20.8	C57BL/6J	F
167212217	418.514	20.9	C57BL/6J	F
167212932	351.009	21.8	C57BL/6J	M
167439900	387.134	20.6	C57BL/6J	M
167440619	402.88	26.9	C57BL/6J	M
167441329	377.36	27.4	C57BL/6J	M
167511639	405.845	24.3	C57BL/6J	M
167512351	394.596	19.6	C57BL/6J	F
167513067	369.763	18.5	C57BL/6J	F
167569313	337.831	19.1	C57BL/6J	M
167570021	363.217	21.3	C57BL/6J	M
167571459	402.975	20.8	C57BL/6J	F
167793416	365.564	19.8	C57BL/6J	F
167904255	386.595	20.1	C57BL/6J	F
167904966	369.804	21.8	C57BL/6J	F
168002780	407.856	22.16	C57BL/6J	F
168004394	390.231	20.8	C57BL/6J	F
168096467	379.835	18.7	C57BL/6J	F
168097187	389.589	18.2	C57BL/6J	F
168165712	370.567	20.2	C57BL/6J	F
168229113	355.858	24.5	C57BL/6J	F
168362462	384.289	21.8	C57BL/6J	F
168363874	393.643	19.4	C57BL/6J	F
168364580	365.567	17.4	C57BL/6J	F
168454779	380.381	18.6	C57BL/6J	F
168455487	352.568	22.6	C57BL/6J	F
171019004	400.863	19.7	C57BL/6J	F
171021122	381.989	17.8	C57BL/6J	F
171067319	391.081	21.1	C57BL/6J	F
171275617	383.824	21.3	C57BL/6J	F
171485060	328.156	15.8	C57BL/6J	F
175718634	371.666	19.3	C57BL/6J	F
175731154	376.81	19.19	C57BL/6J	F
175732001	375.326	20.3	C57BL/6J	F
175739085	382.773	19.7	C57BL/6J	F
175816975	384.343	21.1	C57BL/6J	F
175817683	405.672	21.2	C57BL/6J	F
175818392	387.652	20.8	C57BL/6J	F
176497015	339.678	19.6	C57BL/6J	F
176886238	378.878	17.5	C57BL/6J	F
176899332	354.215	17.9	C57BL/6J	F
177319236	369.449	18.9	C57BL/6J	F
177319974	363.933	18.5	C57BL/6J	F
177780284	371.874	19.6	C57BL/6J	F
177783204	381.269	20.4	C57BL/6J	F
177904363	375.755	19.6	C57BL/6J	F
177907797	401.258	19.8	C57BL/6J	F
178283952	373.031	17.2	C57BL/6J	F
178487444	372.264	21.3	C57BL/6J	F
179641666	381.07	19.7	C57BL/6J	F
181859467	372.471	19.4	C57BL/6J	F
181891184	379.815	20.4	C57BL/6J	F
182029174	374.818	20.9	C57BL/6J	F
182029881	371.498	19.1	C57BL/6J	F
182041643	373.731	24	C57BL/6J	F
182042349	385.501	20.6	C57BL/6J	F
182144176	358.666	18.8	C57BL/6J	F
182224715	382.539	21.3	C57BL/6J	F
182280916	408.792	20.9	C57BL/6J	F
182341627	370.856	19.3	C57BL/6J	F
182460343	370.867	19	C57BL/6J	F
182467026	390.657	20.8	C57BL/6J	F
182516286	375.331	19.4	C57BL/6J	F
182794184	381.388	19.6	C57BL/6J	F
182888003	377.636	22.3	C57BL/6J	F
182890735	401.231	20.2	C57BL/6J	F
182896517	359.896	18	C57BL/6J	F
183173527	397.734	19.8	C57BL/6J	F
183175010	393.476	20.9	C57BL/6J	F
183284388	387.383	19.1	C57BL/6J	F
183329222	403.567	20.8	C57BL/6J	F
183329991	357.911	17.2	C57BL/6J	F
183330908	399.134	20	C57BL/6J	F
184157585	393.299	19.4	C57BL/6J	F
184158290	407.722	21.2	C57BL/6J	F
184159706	393.064	20.9	C57BL/6J	F
184167484	406.928	19.7	C57BL/6J	F
204832917	373.171	21.4	C57BL/6J	F
232311959	380	20.2	C57BL/6J	F
249327301	388.761	20	C57BL/6J	F
249396394	370.979	19.6	C57BL/6J	F
258315443	373.948	20.7	C57BL/6J	F
264631432	385.619	18.9	C57BL/6J	F
265288825	394.484	16.5	FVB.CD1(ICR)	F
265289624	376.912	15.8	FVB.CD1(ICR)	F
265291552	379.886	13.6	FVB.CD1(ICR)	F
265293391	374.853	20.7	FVB.CD1(ICR)	M
265487421	404.114	21.3	FVB.CD1(ICR)	M
266582782	395.673	20.3	FVB.CD1(ICR)	F
267608343	373.652	17.5	C57BL/6J	F
267660272	405.351	39.1	FVB.CD1(ICR)	M
267661018	406.095	34.5	FVB.CD1(ICR)	M
267704653	403.518	25.6	FVB.CD1(ICR)	F
267749821	422.241	34.2	FVB.CD1(ICR)	F
267750528	453.157	25.2	FVB.CD1(ICR)	F
267760731	426.852	35.4	FVB.CD1(ICR)	M
267761438	423.334	32.1	FVB.CD1(ICR)	M
267762146	426.321	34.5	FVB.CD1(ICR)	M
267762859	436.34	32.9	FVB.CD1(ICR)	M
267763584	416.709	32.3	FVB.CD1(ICR)	M
267810394	422.41	23	FVB.CD1(ICR)	F
267811103	424.4	24.7	FVB.CD1(ICR)	F
268205344	414.939	24.7	FVB.CD1(ICR)	F
268206050	408.86	37.2	FVB.CD1(ICR)	M
268208632	419.381	35.1	FVB.CD1(ICR)	M
268323342	397.956	25	FVB.CD1(ICR)	F
272822110	401.078	20.7	C57BL/6J	F
277907462	368.006	12.7	FVB.CD1(ICR)	F
277908168	372.15	15.5	FVB.CD1(ICR)	F
278068196	411.954	36.1	FVB.CD1(ICR)	M
278069982	425.082	37.3	FVB.CD1(ICR)	M
278171908	422.636		FVB.CD1(ICR)	M
278173743	443.17	33.4	FVB.CD1(ICR)	M
278174451	416.299	25	FVB.CD1(ICR)	F
278178382	414.284	23.3	FVB.CD1(ICR)	F
278179794	414.389	33.3	FVB.CD1(ICR)	M
278258073	404.226	27.8	FVB.CD1(ICR)	F
278319402	418.852	25.5	FVB.CD1(ICR)	M
278398243	409.055	31.5	FVB.CD1(ICR)	M
278503555	438.039	28.5	FVB.CD1(ICR)	F
278504263	412.869	34.6	FVB.CD1(ICR)	M
278511717	409.385	35.1	FVB.CD1(ICR)	M
286417464	379.886	19.4	C57BL/6J	F
286648290	426.671	26.7	FVB.CD1(ICR)	F
286648997	398.92	35	FVB.CD1(ICR)	M
286649703	403.868	25	FVB.CD1(ICR)	F
286835688	436.12	27.5	FVB.CD1(ICR)	F
286882342	415.939	27.3	FVB.CD1(ICR)	F
287459601	431.362	29.6	FVB.CD1(ICR)	F
288168426	399.838	28.1	FVB.CD1(ICR)	F
288324211	396.96	24.6	FVB.CD1(ICR)	M
292124058	408.074	37.6	FVB.CD1(ICR)	M
292124765	422.301	28.6	FVB.CD1(ICR)	M
292125472	418.598	27.6	FVB.CD1(ICR)	F
292126180	404.567	26	FVB.CD1(ICR)	F
292172846	418.167	35.3	FVB.CD1(ICR)	M
292173552	429.128	22.4	FVB.CD1(ICR)	F
292174264	409.124	22.7	FVB.CD1(ICR)	F
292209592	377.787	27.2	FVB.CD1(ICR)	M
292210312	417.581	34.5	FVB.CD1(ICR)	M
292372636	425.894	31.3	FVB.CD1(ICR)	M
292477301	403.904	20	FVB.CD1(ICR)	F
292478008	355.847	24.2	FVB.CD1(ICR)	M
292479421	407.454	29.3	FVB.CD1(ICR)	F
292533477	369.541	30	FVB.CD1(ICR)	M
293011049	400.37	21.4	C57BL/6J	F
293889922	340.882	26.3	FVB.CD1(ICR)	M
293942897	354.815	18.8	C57BL/6J	F
294266031	423.785	24.2	FVB.CD1(ICR)	F
294311830	418.142	35.4	FVB.CD1(ICR)	M
297652799	380.628	19.3	C57BL/6J	F
297858011	394.895	36.2	FVB.CD1(ICR)	M
297892843	394.751	21.3	FVB.CD1(ICR)	F
297894255	426.954	29.2	FVB.CD1(ICR)	M
297945448	395.635	33	FVB.CD1(ICR)	M
297946154	387.936	36.5	FVB.CD1(ICR)	M
297987980	369.733	35.1	FVB.CD1(ICR)	M
298230624	396.781	23.8	FVB.CD1(ICR)	F
298275548	395.422	21.2	FVB.CD1(ICR)	F
298325807	393.432	21.9	FVB.CD1(ICR)	F
298350212	391.413	29.1	FVB.CD1(ICR)	F
298835152	373.414	30.4	FVB.CD1(ICR)	F
299244730	390.385	24.3	FVB.CD1(ICR)	F
299408890	374.21	22.1	FVB.CD1(ICR)	F
299448592	406.185	31.4	FVB.CD1(ICR)	M
299656382	354.46	18.8	C57BL/6J	F
299732033	422.472	25.2	FVB.CD1(ICR)	F
299781566	386.104	26.2	FVB.CD1(ICR)	F
299782273	409.259	20.1	FVB.CD1(ICR)	F
300623424	394.048	22	FVB.CD1(ICR)	F
301180385	400.904	24.8	FVB.CD1(ICR)	F
301421960	396.07	22.9	FVB.CD1(ICR)	F
301422682	385.131	22	FVB.CD1(ICR)	F
309515141	408.604	29.6	FVB.CD1(ICR)	F
309564818	388.012	28.3	FVB.CD1(ICR)	F
310193233	356.507	19.8	C57BL/6J	F
475616128	385.901	21	C57BL/6J	F
485022109	388.082	20.5	C57BL/6J	F
577298618	375.111	20.3	C57BL/6J	F

## Sheet: Fig.5B(volume_BL6-CD1_M_vs_F)
Supplemntary table: Table showing strain differences in volume for male and female. The last two columns 1 value correspond to FDR 5% significnce. Related to Figure 5B.
Region	C57BL6_vs_FVB.CD1_Male_volume_effect	C57BL6_vs_FVB.CD1_Female_volume_effect	C57BL6_vs_FVB.CD1_Male_volume_ranksum_qval	C57BL6_vs_FVB.CD1_Female_volume_ranksum_qval
AAA	-0.031775	-0.0209026	1	0
ACAd2/3	-0.0313613	0.0132874	0	0
ACAd5	-0.00785602	0.00175395	0	0
ACAd6a	0.0115755	0.00154185	0	0
ACAv5	0.0255256	0.0406808	0	1
ACB	-0.0632193	-0.0486225	1	1
AHN	-0.0767299	-0.0481783	1	1
AId2/3	-0.0942931	-0.0974523	1	1
AId5	-0.0756242	-0.0471548	1	1
AId6a	-0.0680662	-0.0355482	1	1
AIp2/3	-0.0762946	-0.0907859	1	1
AIp5	-0.146434	-0.104341	1	1
AIp6a	0.0143605	-0.00686931	0	0
AIv2/3	-0.14791	-0.0948141	1	1
AIv5	-0.136136	-0.0933732	1	1
AM	-0.0712265	-0.0655541	1	1
ANcr1	-0.216876	-0.174678	1	1
ANcr2	-0.111237	-0.0597554	1	1
AOB	-0.0766081	-0.0796742	1	1
AON	-0.0505302	-0.017908	1	0
APN	-0.0675359	-0.0616386	1	1
APr	-0.1011	-0.103497	1	1
AUDd	-0.053262	-0.0425646	1	1
AUDp2/3	-0.100236	-0.120502	1	1
AUDp5	-0.0765148	-0.0871262	1	1
AUDpo	-0.0660634	-0.0672897	1	1
AUDv2/3	-0.11352	-0.130184	1	1
AUDv5	-0.155655	-0.143447	1	1
AV	-0.13124	-0.105577	1	1
BLAa	-0.0239716	-0.0177844	1	0
BLAp	-0.0720619	-0.0483073	1	1
BLAv	-0.0408426	-0.020141	1	1
BMAa	-0.00669416	0.0156474	0	0
BMAp	-0.0808999	-0.0689784	1	1
BST	-0.0728398	-0.0242005	1	1
CA1	-0.15672	-0.120337	1	1
CA2	-0.170413	-0.130397	1	1
CA3	-0.109827	-0.076447	1	1
CEAm	-0.0918961	-0.0625992	1	1
CENT2	-0.445456	-0.427825	1	1
CENT3	-0.247028	-0.247376	1	1
CL	-0.0653661	-0.0669054	1	1
CLA	-0.0731325	-0.0545579	1	1
COAa	-0.0447827	-0.050053	1	1
COApl	-0.121955	-0.100034	1	1
COApm	-0.125501	-0.102564	1	1
COPY	-0.116602	-0.117846	1	1
CP	-0.103916	-0.0618762	1	1
CUL4, 5	-0.182279	-0.181553	1	1
CUN	-0.136626	-0.131273	1	1
DCO	-0.107394	-0.0817486	1	1
DEC	-0.179547	-0.214196	1	1
DG-mo	-0.103843	-0.0950952	1	1
DG-po	-0.0585931	-0.0526602	1	1
DG-sg	-0.0456409	-0.0576192	1	1
DP	-0.0224499	-0.0123408	0	0
ECT2/3	-0.116845	-0.138938	1	1
ECT5	-0.0997223	-0.0919947	1	1
ECT6a	-0.0663341	-0.0296332	1	1
ENTl2	0.0277611	0.0414532	1	1
ENTl3	0.0186152	0.0195942	0	0
ENTl5	0.00201553	0.00312719	0	0
ENTl6a	0.0016245	0.00826433	0	0
ENTm1	-0.0372457	-0.0440304	1	1
ENTm2	-0.0640003	-0.0533116	1	1
ENTm3	-0.0855613	-0.052579	1	1
ENTm5	-0.0983541	-0.0696894	1	1
ENTm6	-0.0703273	-0.0800382	1	1
EPI	-0.0252071	-0.0207315	1	0
EPd	-0.0234251	-0.00950538	0	0
EPv	-0.0526986	-0.0477228	1	1
FL	-0.19977	-0.217405	1	1
FOTU	-0.0991058	-0.10902	1	1
FRP	-0.0206795	-0.0198414	0	0
FS	-0.0694293	-0.0773856	1	1
GPe	-0.0289104	-0.0446036	0	1
GU2/3	-0.0670743	-0.0850059	1	1
GU5	-0.0367533	-0.0195469	1	0
GU6a	0.00953237	-0.000832931	0	0
HATA	-0.139188	-0.106887	1	1
ICc	-0.147437	-0.123675	1	1
ICd	-0.125042	-0.105959	1	1
ICe	-0.0965663	-0.0598686	1	1
ILA	-0.0123689	-0.0319289	0	0
IP	-0.0250384	-0.0409735	0	0
LA	0.0351902	0.051243	1	1
LD	-0.0329315	0.000189083	0	0
LGd-co	-0.0682511	-0.0620692	1	1
LGv	-0.0554263	-0.0731587	1	1
LP	-0.0904623	-0.0660026	1	1
LPO	-0.110263	-0.07543	1	1
LSr	-0.0779851	-0.0490517	1	1
LSv	-0.105331	-0.0594488	1	1
MD	-0.0990254	-0.0925111	1	1
MEA	-0.0647496	-0.0420658	1	1
MG	-0.091762	-0.119648	1	1
MOB	0.167607	0.0785129	1	1
MOp2/3	-0.0190868	-0.0189197	0	0
MOp5	-0.0333083	-0.00168069	0	0
MOp6a	-0.0424856	-0.0394655	1	1
MOs1	-0.00430607	0.0169963	0	0
MOs2/3	-0.00235774	0.0102723	0	0
MOs5	-0.0168291	0.0301703	0	0
MOs6a	0.000360956	-0.0337805	0	0
MPN	-0.0330671	-0.00852254	0	0
MPO	-0.0572481	0.00230531	1	0
MV	-0.09023	-0.129907	1	1
NOD	-0.25735	-0.227683	1	1
NTS	-0.0523898	-0.0468893	1	1
ORBl1	-0.107513	-0.0717218	1	1
ORBl2/3	-0.151616	-0.103163	1	1
ORBl5	-0.119963	-0.086096	1	1
ORBl6a	-0.0928509	-0.094773	1	1
ORBm5	-0.0520097	-0.0288146	1	0
ORBvl1	-0.107615	-0.0283424	1	1
ORBvl2/3	-0.138406	-0.0851664	1	1
ORBvl5	-0.0970006	-0.0686644	1	1
OT	-0.0525317	-0.0516236	1	1
PA	-0.100352	-0.0506599	1	1
PAA	-0.129106	-0.0863116	1	1
PAG	-0.100706	-0.0677343	1	1
PAR	-0.114865	-0.115535	1	1
PB	-0.0580863	-0.0524526	1	1
PCG	-0.00735634	-0.00430048	0	0
PERI	-0.0117876	-0.0122217	0	0
PF	-0.0821808	-0.0722975	1	1
PFL	-0.261595	-0.235886	1	1
PG	-0.117539	-0.185908	1	1
PH	-0.0642623	-0.0465761	1	1
PIR	-0.0686989	-0.0362785	1	1
PL2/3	0.00429625	6.67347e-06	0	0
PL5	-0.00558878	-0.000995101	0	0
PL6a	-0.069062	-0.0554377	0	1
PO	-0.03805	-0.0202559	1	0
POST	-0.125649	-0.105891	1	1
PRE	-0.141249	-0.131497	1	1
PRM	-0.133794	-0.110322	1	1
PYR	-0.0561017	-0.0267296	1	1
ProS	-0.0880265	-0.0838826	1	1
RSPagl1	-0.0551476	-0.0392448	1	1
RSPagl2/3	-0.0761438	-0.023117	1	1
RSPagl5	-0.0876106	-0.0355067	1	1
RSPagl6a	-0.104863	-0.0971588	1	1
RSPd2/3	-0.0985155	-0.0540526	1	1
RSPd5	-0.101513	-0.0641986	1	1
RSPd6a	-0.0782594	-0.0811238	1	1
RSPv2/3	-0.114133	-0.0888966	1	1
RSPv5	-0.0976145	-0.0593927	1	1
RSPv6a	-0.0773763	-0.0709793	1	1
RT	-0.0725225	-0.0736588	1	1
SCdg	-0.0972836	-0.063867	1	1
SCig	-0.100629	-0.054399	1	1
SCiw	-0.0635496	-0.0354701	1	1
SCop	-0.146894	-0.135113	1	1
SCsg	-0.144586	-0.1636	1	1
SCzo	-0.0764199	-0.0862622	1	1
SF	-0.00864562	-0.0500965	0	1
SI	-0.0851848	-0.0611236	1	1
SIM	-0.23392	-0.168572	1	1
SNr	-0.0510358	-0.0299649	1	0
SSp-bfd2/3	-0.0776568	-0.0385195	1	1
SSp-bfd4	-0.147815	-0.0858353	1	1
SSp-bfd5	-0.10243	-0.0662003	1	1
SSp-bfd6a	-0.0611785	-0.036563	1	1
SSp-ll2/3	-0.0588826	-0.0565189	1	1
SSp-ll5	-0.0134705	-0.0583399	0	1
SSp-ll6a	-0.0409355	-0.0189042	0	1
SSp-m2/3	-0.038301	-0.0567747	1	1
SSp-m4	-0.106213	-0.107423	1	1
SSp-m5	-0.106527	-0.0997768	1	1
SSp-m6a	-0.0748131	-0.0655714	1	1
SSp-n2/3	-0.0362036	-0.0112866	1	0
SSp-n4	-0.120293	-0.084125	1	1
SSp-n5	-0.0956126	-0.0631401	1	1
SSp-n6a	-0.0822589	-0.0771545	1	1
SSp-tr2/3	-0.0702605	-0.0398606	1	1
SSp-ul2/3	-0.0078037	-0.0186041	0	0
SSp-ul4	-0.0980752	-0.0773763	1	1
SSp-ul5	-0.0572353	-0.0218273	1	1
SSp-ul6a	-0.00448301	0.0346101	0	1
SSp-un	-0.0586954	-0.0354978	1	1
SSs2/3	-0.0184708	-0.0225739	0	0
SSs4	-0.0590698	-0.0524665	1	1
SSs5	-0.0657454	-0.0697843	1	1
SSs6a	-0.0702192	-0.0802303	1	1
SUB	-0.122797	-0.0958003	1	1
TEa2/3	-0.116021	-0.125307	1	1
TEa5	-0.1248	-0.133886	1	1
TEa6a	-0.0961947	-0.10373	1	1
TR	-0.0971691	-0.0641563	1	1
TTd	-0.0417832	0.00396617	1	0
TTv	-0.0710471	-0.010277	1	0
UVU	-0.114158	-0.0977398	1	1
VAL	-0.062455	-0.0553971	1	1
VISC2/3	-0.0535111	-0.0465761	0	1
VISC5	-0.0830756	-0.0788026	1	1
VISC6a	-0.0228712	-0.0404256	1	1
VISa2/3	-0.0354882	-0.0252646	1	1
VISal	-0.0933444	-0.0872084	1	1
VISam	-0.109094	-0.0785599	1	1
VISl	-0.146071	-0.120966	1	1
VISli	-0.109231	-0.0956597	1	1
VISp2/3	-0.0679097	-0.0738914	1	1
VISp4	-0.134607	-0.126925	1	1
VISp5	-0.109356	-0.0794949	1	1
VISp6a	-0.117703	-0.127769	1	1
VISpl	-0.108208	-0.126361	1	1
VISpm	-0.0682172	-0.060942	1	1
VISpor2/3	-0.0846891	-0.0557279	1	1
VISpor5	-0.115986	-0.118638	1	1
VISrl	-0.086497	-0.0558233	1	1
VM	-0.0747114	-0.0807065	1	1
VMH	-0.0705774	-0.0556774	1	1
VPL	-0.040578	-0.0596237	1	1
VPM	-0.0931937	-0.0889603	1	1
ZI	-0.0506023	-0.0438322	1	1

## Sheet: Fig.5C(density_BL6-CD1_M_vs_F)
Supplemntary table: Table showing strain differences in cell density for male and female. The last two columns 1 value correspond to FDR 5% significnce. Related to Figure 5C.
region	C57BL6_vs_FVB.CD1_M_density_effect	C57BL6_vs_FVB.CD1_F_density3d_effect	BL6_vs_CD1_M_density_ranksum_qval	BL6_vs_CD1_F_density_ranksum_qval
AAA	-0.101971	-0.000758952	0	0
ACAd2/3	-0.0767851	-0.022871	1	0
ACAd5	-0.104684	-0.0889617	1	1
ACAd6a	-0.121778	-0.0563442	1	0
ACAv5	-0.0823926	-0.0570028	1	1
ACB	-0.0322125	0.0312046	0	0
AHN	0.000794733	0.0436343	0	0
AId2/3	-0.168428	-0.0645898	1	0
AId5	-0.15061	-0.0741305	1	1
AId6a	-0.235586	-0.0637195	1	0
AIp2/3	-0.121728	-0.0558598	1	0
AIp5	-0.144901	-0.150198	1	1
AIp6a	-0.125856	-0.042432	1	0
AIv2/3	-0.114228	-0.0392837	1	0
AIv5	-0.159334	-0.0734526	1	1
AM	-0.031451	0.0954496	0	1
ANcr1	0.0730434	0.0862147	1	1
ANcr2	0.0503362	0.0765775	1	1
AOB	0.228914	0.298244	1	1
AON	-0.131129	0.0915192	0	0
APN	-0.0571321	0.0595266	0	0
APr	-0.0155743	-0.0222457	0	0
AUDd	-0.10084	-0.0642187	1	1
AUDp2/3	-0.160584	-0.0838835	1	1
AUDp5	-0.112141	-0.099704	1	1
AUDpo	-0.132041	-0.0544341	1	1
AUDv2/3	-0.15091	-0.0720392	1	1
AUDv5	-0.112619	-0.075933	1	1
AV	-0.0861674	-0.0471943	1	0
BLAa	-0.102766	-0.087484	1	0
BLAp	-0.101226	-0.0482222	1	1
BLAv	-0.0890575	-0.0889229	0	0
BMAa	-0.00883094	0.00109295	0	0
BMAp	-0.111637	-0.0726287	1	1
BST	0.015194	0.0302974	0	1
CA1	-0.00151809	0.00805333	0	0
CA2	-0.0470963	-0.0299926	0	0
CA3	-0.077127	-0.0713224	1	1
CEAm	-0.0189574	-0.0103092	0	0
CENT2	-0.0760873	0.0038875	1	0
CENT3	0.121539	0.114241	1	1
CL	-0.13838	-0.00779772	0	0
CLA	-0.125234	-0.0790516	1	1
COAa	-0.014932	0.00495759	0	0
COApl	-0.0601105	-0.00411701	0	0
COApm	-0.0048167	0.0180489	0	0
COPY	0.0527796	0.0872949	1	1
CP	-0.0329317	0.0054943	0	0
CUL4, 5	0.0860843	0.0942055	1	1
CUN	0.0165152	0.10602	0	0
DCO	-0.0507011	0.0598567	0	0
DEC	0.0367249	0.05837	0	0
DG-mo	0.0950445	0.104689	1	1
DG-po	-0.0461321	-0.0403728	0	0
DG-sg	-0.0170532	0.0066609	0	0
DP	-0.0610492	0.0142647	1	0
ECT2/3	-0.0500989	0.0645047	0	0
ECT5	-0.109056	-0.0335876	1	0
ECT6a	-0.116911	-0.0178	1	0
ENTl2	-0.0203483	0.0938706	0	0
ENTl3	-0.134357	0.0290154	1	0
ENTl5	-0.0676397	0.0602832	0	0
ENTl6a	-0.121699	0.00374536	1	0
ENTm1	0.0566813	0.0775188	0	1
ENTm2	-0.0790162	-0.0421813	1	0
ENTm3	-0.126657	-0.0692973	1	0
ENTm5	-0.045228	0.00374776	0	0
ENTm6	-0.0312208	0.0324364	0	0
EPI	-0.0153379	0.138524	0	0
EPd	-0.148419	0.0198056	1	0
EPv	-0.0999097	0.0134893	0	0
FL	0.0421826	0.0626027	0	1
FOTU	0.0880214	0.114334	1	1
FRP	-0.116991	-0.0527038	1	0
FS	0.00327615	0.0713099	0	0
GPe	0.104194	0.00686875	0	0
GU2/3	-0.143503	-0.0823831	1	1
GU5	-0.156155	-0.0789607	1	1
GU6a	-0.170981	-0.0528618	1	0
HATA	0.0353857	0.0325062	1	0
ICc	0.0131824	0.0644482	0	0
ICd	0.0523198	0.0519268	0	0
ICe	0.069175	0.0883154	0	0
ILA	-0.0986611	-0.0306364	1	0
IP	-0.0523551	-0.0336501	0	0
LA	-0.0589121	-0.024403	1	0
LD	-0.0988956	-0.0156242	0	0
LGd-co	-0.267904	-0.0557958	1	0
LGv	0.0521694	0.0468992	0	0
LP	-0.228515	0.0387552	1	0
LPO	0.110043	0.0218167	0	0
LSr	-0.0991219	0.00965117	0	0
LSv	-0.0499727	0.0127872	0	0
MD	-0.125561	-0.0566024	0	0
MEA	-0.00636946	0.0383505	0	0
MG	-0.119339	-0.138684	0	0
MOB	0.175008	0.290599	1	1
MOp2/3	-0.105778	-0.0660687	1	1
MOp5	-0.0783531	-0.070012	1	1
MOp6a	-0.0986616	0.00295733	0	0
MOs1	0.099614	0.120106	1	1
MOs2/3	-0.0825152	-0.00723344	1	0
MOs5	-0.108132	-0.0793871	1	1
MOs6a	-0.145825	-0.124847	0	0
MPN	-0.0187792	-0.00840764	0	0
MPO	-0.027679	0.0110528	0	0
MV	-0.0420936	-0.0228037	0	0
NOD	0.00958677	0.0338493	0	0
NTS	0.100319	0.220917	1	1
ORBl1	0.073106	0.0867161	0	0
ORBl2/3	-0.0864387	0.0254128	1	0
ORBl5	-0.155949	-0.0942847	1	1
ORBl6a	-0.200048	-0.0479614	1	0
ORBm5	-0.12136	-0.0723455	1	0
ORBvl1	0.0966749	0.148281	1	1
ORBvl2/3	-0.0646131	-0.040761	1	0
ORBvl5	-0.136557	-0.094801	1	1
OT	-0.0572038	0.00921595	0	0
PA	-0.0440401	-0.0205517	0	0
PAA	-0.101409	-0.0652025	1	0
PAG	-0.00660206	0.10602	0	0
PAR	-0.0281788	0.0229086	0	0
PB	-0.0904787	0.0560759	0	0
PCG	0.0129217	0.136683	0	0
PERI	-0.0451601	0.0827731	0	0
PF	-0.149595	-0.0178865	0	0
PFL	0.0345633	0.05912	0	1
PG	0.0569201	0.0654343	0	0
PH	0.0261589	0.0718719	0	0
PIR	-0.0738111	-0.0219311	1	0
PL2/3	-0.0563326	0.0215417	1	0
PL5	-0.110429	-0.0641185	1	0
PL6a	-0.125068	0.0310404	1	0
PO	-0.258245	-0.155172	1	1
POST	-0.0258248	0.0200733	0	0
PRE	0.0475489	0.0735967	0	0
PRM	0.0479981	0.0812605	1	1
PYR	0.0999888	0.116882	1	1
ProS	-0.00812123	-0.011106	0	0
RSPagl1	0.0365366	0.0298746	0	0
RSPagl2/3	-0.0944604	-0.0452327	1	1
RSPagl5	-0.11518	-0.106225	1	1
RSPagl6a	-0.125029	-0.0960049	1	1
RSPd2/3	-0.0541709	-0.0738813	1	1
RSPd5	-0.0698849	-0.0878299	1	1
RSPd6a	-0.0916433	-0.0477403	0	0
RSPv2/3	0.0940158	0.0459877	1	0
RSPv5	-0.0130768	-0.0345138	0	0
RSPv6a	-0.0436589	0.0209234	0	0
RT	0.0344696	0.0827633	0	0
SCdg	0.0678964	0.111249	0	0
SCig	0.00682516	0.0712014	0	0
SCiw	-0.00325113	0.0906924	0	0
SCop	0.0216029	0.0270538	0	0
SCsg	-0.00546995	0.0278661	0	0
SCzo	0.0560768	0.11156	0	1
SF	-0.0442992	0.154115	0	0
SI	-0.0441817	-0.00322212	0	0
SIM	0.0124401	0.0398487	0	1
SNr	-0.094415	-0.0428649	0	0
SSp-bfd2/3	-0.0930552	-0.0861991	1	1
SSp-bfd4	-0.0688956	-0.0423279	1	1
SSp-bfd5	-0.0934397	-0.106252	1	1
SSp-bfd6a	-0.101557	-0.0303228	1	0
SSp-ll2/3	-0.101595	-0.0878455	1	1
SSp-ll5	-0.0734319	-0.0730206	1	1
SSp-ll6a	-0.0739834	0.00530206	0	0
SSp-m2/3	-0.142804	-0.0921692	1	1
SSp-m4	-0.0858108	-0.0680259	1	1
SSp-m5	-0.126685	-0.116759	1	1
SSp-m6a	-0.149699	0.0376851	1	0
SSp-n2/3	-0.098185	-0.0627623	1	1
SSp-n4	-0.0769833	-0.0470348	1	1
SSp-n5	-0.102089	-0.103443	1	1
SSp-n6a	-0.119779	-0.0256845	1	0
SSp-tr2/3	-0.0680648	-0.0499914	1	1
SSp-ul2/3	-0.110311	-0.102564	1	1
SSp-ul4	-0.0695549	-0.0522112	1	1
SSp-ul5	-0.0766637	-0.0839539	1	1
SSp-ul6a	-0.0601815	0.0210654	0	0
SSp-un	-0.0746292	-0.0676154	1	1
SSs2/3	-0.106605	-0.0730161	1	1
SSs4	-0.0877776	-0.0378374	1	1
SSs5	-0.108771	-0.0976905	1	1
SSs6a	-0.125173	-0.0210769	1	0
SUB	-0.0391245	-0.0266339	0	0
TEa2/3	-0.0892753	-0.0434359	1	0
TEa5	-0.106906	-0.048955	1	1
TEa6a	-0.115937	-0.0325838	1	0
TR	-0.0542465	-0.02168	0	0
TTd	-0.101465	-0.0127409	0	0
TTv	-0.0693503	0.155973	0	1
UVU	0.106876	0.126504	1	1
VAL	-0.044657	0.0957607	0	0
VISC2/3	-0.0986959	-0.0554075	1	1
VISC5	-0.136177	-0.104732	1	1
VISC6a	-0.185474	-0.112789	1	1
VISa2/3	-0.0656086	-0.0783078	1	0
VISal	-0.105796	-0.0516685	1	1
VISam	-0.157285	-0.0857854	1	1
VISl	-0.106969	-0.0803777	1	1
VISli	-0.107954	-0.0586573	1	1
VISp2/3	-0.102744	-0.0648459	1	1
VISp4	-0.0779862	-0.0758163	1	1
VISp5	-0.0996164	-0.0928391	1	1
VISp6a	-0.112812	-0.0683604	1	1
VISpl	-0.0561099	-0.00714864	0	0
VISpm	-0.128206	-0.10396	1	1
VISpor2/3	-0.0952373	-0.0736488	1	1
VISpor5	-0.0904573	-0.0357508	1	0
VISrl	-0.0848914	-0.0661026	1	1
VM	-0.0768949	-0.0318949	0	0
VMH	-0.00194715	-0.00256477	0	0
VPL	0.0924185	0.0366101	0	0
VPM	-0.140115	0.0507435	1	0
ZI	0.0268693	0.0451797	0	0

## Sheet: Fig.5D(volume_BL6_vs_CD1_M-F)
Supplemntary table: Table showing sex differences in region volume for C57BL6 and FVB.CD1. The last two columns 1 value correspond to FDR 5% significnce. Related to Figure 5D.
region	C57BL6_male_vs_female_volume_effect	FVB.CD1_male_vs_female_volume_effect	C57BL6_male_vs_female_volume_ranksum_qval	FVB.CD1_male_vs_female_volume_ranksum_qval
AAA	-0.00417892	0.00669536	0	0
ACAd2/3	-0.0189318	0.0257178	0	0
ACAd5	-0.0176928	-0.00808323	1	0
ACAd6a	0.00594397	-0.00408981	0	0
ACAv5	-0.0147602	0.000399048	0	0
ACB	-0.0123502	0.00225794	0	0
AHN	0.0306535	0.0592185	1	0
AId2/3	-0.00138193	-0.00454842	0	0
AId5	-0.0336222	-0.00512861	1	0
AId6a	-0.0206701	0.0118695	1	0
AIp2/3	-0.0299493	-0.0444609	1	0
AIp5	-0.0375318	0.0047245	1	0
AIp6a	0.0033551	-0.0178745	0	0
AIv2/3	-0.0417757	0.0115137	1	0
AIv5	-0.0542649	-0.0113727	1	0
AM	-0.0365443	-0.0308669	1	0
ANcr1	-0.0102574	0.0323483	0	0
ANcr2	0.00691852	0.0584804	0	0
AOB	0.0334065	0.0303365	1	0
AON	-0.006856	0.0257751	0	0
APN	0.00232843	0.0082318	0	0
APr	0.0151377	0.0127342	1	0
AUDd	-0.0150756	-0.00437219	0	0
AUDp2/3	-0.0109126	-0.0312383	0	0
AUDp5	0.0240944	0.0134662	0	0
AUDpo	0.00387704	0.00264938	0	0
AUDv2/3	-0.0140134	-0.0307374	0	0
AUDv5	-0.00610185	0.00617451	0	0
AV	-0.0331642	-0.00741385	1	0
BLAa	-0.00175528	0.00443266	0	0
BLAp	-0.012735	0.0110411	0	0
BLAv	-0.000274922	0.0204309	0	0
BMAa	0.0261021	0.048436	1	0
BMAp	0.015316	0.0272529	0	0
BST	0.080118	0.128653	1	1
CA1	0.00768092	0.0442333	0	0
CA2	0.00667009	0.0469059	0	0
CA3	0.0174446	0.0508871	1	0
CEAm	0.0378321	0.0671525	1	1
CENT2	-0.0230964	-0.0045834	0	0
CENT3	0.000975628	0.000622337	0	0
CL	-0.00656134	-0.00810224	0	0
CLA	-0.0230476	-0.00445489	1	0
COAa	0.0326501	0.027378	1	0
COApl	0.0240691	0.0460505	1	0
COApm	0.0300162	0.0530178	1	0
COPY	0.00114915	-9.91287e-05	0	0
CP	-0.039118	0.00299053	1	0
CUL4, 5	-0.00131743	-0.000585136	0	0
CUN	0.0120097	0.0173862	0	0
DCO	-0.000822662	0.0248795	0	0
DEC	-0.0105572	-0.0455392	0	0
DG-mo	0.0264345	0.0352016	1	0
DG-po	-0.00177466	0.00416284	0	0
DG-sg	0.0315622	0.0195779	1	0
DP	-0.0106905	-0.000580729	0	0
ECT2/3	-0.0416359	-0.0638037	1	0
ECT5	-0.0150475	-0.00730232	0	0
ECT6a	-0.0146617	0.0220602	0	0
ENTl2	-0.0118744	0.00182179	0	0
ENTl3	-0.00537472	-0.00439566	0	0
ENTl5	0.0133074	0.0144191	0	0
ENTl6a	0.00940506	0.0160447	1	0
ENTm1	0.00429789	-0.00248956	0	0
ENTm2	-0.00706559	0.00363231	0	0
ENTm3	-0.00545233	0.0275684	0	0
ENTm5	0.00189088	0.0306044	0	0
ENTm6	0.0100339	0.000309331	0	0
EPI	0.00803082	0.0125069	0	0
EPd	-0.0161479	-0.00222746	0	0
EPv	-0.00685955	-0.00188066	0	0
FL	0.0238291	0.00600165	1	0
FOTU	-0.00232573	-0.012267	0	0
FRP	-0.0498793	-0.0490416	1	0
FS	0.0107966	0.00282979	0	0
GPe	-0.000605351	-0.0163035	0	0
GU2/3	-0.018353	-0.0363072	0	0
GU5	-0.0413427	-0.0241375	1	0
GU6a	-0.0394909	-0.0498511	1	0
HATA	-0.0161218	0.0163027	0	0
ICc	0.00642351	0.0302933	0	0
ICd	-0.00389187	0.0152549	0	0
ICe	0.0183394	0.0550808	0	0
ILA	8.1899e-05	-0.0194801	0	0
IP	0.0341673	0.0182306	1	0
LA	-0.0110186	0.00504172	0	0
LD	-0.0150835	0.0180393	0	0
LGd-co	0.0138926	0.0200806	0	0
LGv	0.0349058	0.017158	1	0
LP	0.00377679	0.0282724	0	0
LPO	0.0135538	0.0484535	0	0
LSr	-0.0196287	0.00933363	1	0
LSv	0.0244305	0.0703645	0	0
MD	-0.0221635	-0.0156348	1	0
MEA	0.0660395	0.0887056	1	1
MG	0.00777534	-0.0201886	0	0
MOB	0.0268809	-0.0625444	1	0
MOp2/3	-0.0336828	-0.0335158	1	0
MOp5	-0.0378456	-0.0062194	1	0
MOp6a	-0.0271415	-0.0241206	1	0
MOs1	-0.0197838	0.00151838	0	0
MOs2/3	-0.0329416	-0.0203138	1	0
MOs5	-0.0474628	-0.00046956	1	0
MOs6a	0.00264993	-0.0314921	0	0
MPN	0.0535496	0.0780702	1	0
MPO	0.0253768	0.0848962	1	1
MV	0.0146265	-0.0251704	0	0
NOD	0.00735571	0.0374612	0	0
NTS	0.0148575	0.0203609	0	0
ORBl1	-0.0249456	0.010917	1	0
ORBl2/3	-0.0325123	0.0161375	1	0
ORBl5	-0.0157146	0.0182425	0	0
ORBl6a	0.0263414	0.0244155	0	0
ORBm5	-0.0441814	-0.020983	1	0
ORBvl1	-0.0545831	0.0247766	1	0
ORBvl2/3	-0.067118	-0.0137337	1	0
ORBvl5	-0.0156957	0.0126892	0	0
OT	0.0201384	0.021047	1	0
PA	0.0384025	0.0881153	1	1
PAA	-0.0262109	0.0167077	1	0
PAG	0.00354135	0.036568	0	0
PAR	0.0128932	0.012221	0	0
PB	-0.0118887	-0.00625087	0	0
PCG	-0.00909008	-0.00603425	0	0
PERI	-0.00877809	-0.00921214	0	0
PF	-0.00881695	0.00108113	0	0
PFL	0.0181569	0.044264	0	0
PG	0.0313009	-0.0374632	1	0
PH	0.00870587	0.0264044	0	0
PIR	-0.00838726	0.0240549	0	0
PL2/3	-0.0163097	-0.0205989	0	0
PL5	-0.0481309	-0.0435396	1	0
PL6a	-0.0120307	0.00160667	0	0
PO	-0.0109673	0.00683051	0	0
POST	0.0208069	0.040626	1	0
PRE	0.00360868	0.013406	0	0
PRM	0.00441749	0.0279755	0	0
PYR	0.00672161	0.0361029	0	0
ProS	0.00343067	0.00758219	0	0
RSPagl1	0.00991031	0.0258207	0	0
RSPagl2/3	-0.0255787	0.0274808	1	0
RSPagl5	-0.0280707	0.0240826	1	0
RSPagl6a	-0.00125398	0.00647033	0	0
RSPd2/3	-0.00962737	0.0348985	0	0
RSPd5	-0.0184667	0.0189115	1	0
RSPd6a	0.00843579	0.00556694	0	0
RSPv2/3	0.00204234	0.0273423	0	0
RSPv5	-0.0176111	0.0206696	0	0
RSPv6a	-0.00507603	0.0013298	0	0
RT	0.00135906	0.000221147	0	0
SCdg	0.00540402	0.0388709	0	0
SCig	0.00233417	0.0486264	0	0
SCiw	0.0118198	0.0399117	0	0
SCop	0.00537721	0.0172171	0	0
SCsg	0.0369813	0.0178577	1	0
SCzo	0.0461912	0.0363368	1	0
SF	0.000278086	-0.0411774	0	0
SI	-0.0130349	0.0110586	0	0
SIM	-0.0100562	0.0559523	0	0
SNr	0.0151743	0.0362504	0	0
SSp-bfd2/3	-0.0284956	0.010674	1	0
SSp-bfd4	-0.0186069	0.0435826	0	0
SSp-bfd5	-0.0124319	0.0238617	0	0
SSp-bfd6a	-0.00707764	0.0175524	0	0
SSp-ll2/3	-0.0342381	-0.0318732	1	0
SSp-ll5	0.0121271	-0.0327556	0	0
SSp-ll6a	-0.00260806	0.0194278	0	0
SSp-m2/3	-0.000673407	-0.0191571	0	0
SSp-m4	0.00455357	0.00333983	0	0
SSp-m5	-0.0113912	-0.00462317	0	0
SSp-m6a	-0.0126264	-0.00337348	0	0
SSp-n2/3	-0.059952	-0.0350455	1	0
SSp-n4	-0.0548627	-0.0186118	1	0
SSp-n5	-0.015077	0.0174468	0	0
SSp-n6a	0.0025711	0.0076836	0	0
SSp-tr2/3	-0.0397818	-0.00936343	1	0
SSp-ul2/3	-0.0442365	-0.0550307	1	0
SSp-ul4	-0.031397	-0.0106605	1	0
SSp-ul5	-0.0360779	-0.000659051	1	0
SSp-ul6a	-0.0384785	0.000613384	1	0
SSp-un	-0.0153708	0.00783966	1	0
SSs2/3	-0.019946	-0.0240491	1	0
SSs4	-0.00769866	-0.00109031	0	0
SSs5	-0.0252977	-0.0293404	1	0
SSs6a	-0.0137903	-0.0238147	1	0
SUB	0.00246296	0.0295387	0	0
TEa2/3	-0.0290495	-0.0383671	1	0
TEa5	-0.00181035	-0.0109345	0	0
TEa6a	-0.00387578	-0.0114298	0	0
TR	-0.0368778	-0.00381464	1	0
TTd	-0.052038	-0.00629419	1	0
TTv	-0.0226854	0.0381089	1	0
UVU	0.0135241	0.0299867	0	0
VAL	-0.0171854	-0.0101217	0	0
VISC2/3	-0.00216346	0.00477588	0	0
VISC5	-0.0100041	-0.00572417	0	0
VISC6a	-0.0161892	-0.0337453	0	0
VISa2/3	-0.0291091	-0.0188846	1	0
VISal	0.00879018	0.0149385	0	0
VISam	-0.0145568	0.0160444	0	0
VISl	0.0084916	0.0337059	0	0
VISli	0.00505164	0.0186584	0	0
VISp2/3	0.0197141	0.0137253	0	0
VISp4	0.013572	0.0212867	0	0
VISp5	0.00455557	0.0344805	0	0
VISp6a	0.0115737	0.00146951	0	0
VISpl	0.024672	0.00645739	1	0
VISpm	0.00521386	0.0124964	0	0
VISpor2/3	-0.0127483	0.0162487	0	0
VISpor5	0.00139155	-0.00127007	0	0
VISrl	-0.00850174	0.0222105	0	0
VM	-0.0151479	-0.0211516	0	0
VMH	0.0237655	0.0386767	1	0
VPL	-0.0178625	-0.0369166	0	0
VPM	-0.0288362	-0.0245948	1	0
ZI	0.0052532	0.012027	0	0

## Sheet: Fig.5E(density_BL6_vs_CD1_M-F)
Supplemntary table: Table showing sex differences in cell density for C57BL6 and FVB.CD1. The last two columns 1 value correspond to FDR 5% significnce. Related to Figure 5E.
Region	C57BL6_male_vs_female_density_effect	FVB.CD1_male_vs_female_density3d_effect	C57BL6_male_vs_female_density3d_ranksum_qval	FVB.CD1_male_vs_female_density3d_ranksum_qval
AAA	0.032855	0.133958	1	0
ACAd2/3	0.0199449	0.0738628	0	0
ACAd5	0.0114912	0.0272487	0	0
ACAd6a	-0.00956125	0.0559935	0	0
ACAv5	0.00795558	0.0333736	0	0
ACB	0.0167126	0.0800926	0	0
AHN	0.0646064	0.107372	1	0
AId2/3	0.00394118	0.108051	0	1
AId5	-0.000977239	0.0757179	0	0
AId6a	0.00522432	0.177698	0	0
AIp2/3	0.032419	0.0983471	0	0
AIp5	0.0843562	0.0790398	1	0
AIp6a	0.0325424	0.115999	0	1
AIv2/3	0.024127	0.0991108	0	1
AIv5	0.0294643	0.115524	0	1
AM	-0.00619553	0.120634	0	0
ANcr1	-0.00302914	0.010163	0	0
ANcr2	-0.00145458	0.0248123	0	0
AOB	0.0524049	0.122825	0	0
AON	0.0422949	0.263658	1	1
APN	0.02211	0.13858	0	0
APr	0.0282931	0.0216221	1	0
AUDd	0.0340149	0.0706731	1	0
AUDp2/3	0.0481323	0.124976	1	1
AUDp5	0.039284	0.05175	1	0
AUDpo	0.0191444	0.0968552	0	0
AUDv2/3	0.0546254	0.133567	1	1
AUDv5	0.0347839	0.0715258	1	0
AV	0.0102388	0.0492466	0	0
BLAa	0.0840503	0.0993344	1	0
BLAp	0.0609315	0.113908	1	0
BLAv	0.0884203	0.0885549	1	0
BMAa	0.0536931	0.0636085	1	0
BMAp	0.055797	0.094833	1	0
BST	0.0157879	0.0308912	0	0
CA1	0.0172511	0.0268213	0	0
CA2	-0.00879745	0.00831261	0	0
CA3	-0.00289679	0.00291582	0	0
CEAm	0.0612312	0.0698706	1	0
CENT2	-0.0133891	0.0665976	0	0
CENT3	0.00115635	-0.00616626	0	0
CL	-0.00423101	0.126404	0	0
CLA	0.0190074	0.06529	0	0
COAa	0.0342873	0.0541672	0	0
COApl	0.0283299	0.0842934	0	0
COApm	0.0174219	0.040283	0	0
COPY	-0.00394406	0.0306121	0	0
CP	0.0136169	0.0520344	0	0
CUL4, 5	-0.00122902	0.00690876	0	0
CUN	0.063439	0.152766	0	0
DCO	0.0260572	0.136433	0	0
DEC	0.00167755	0.0233341	0	0
DG-mo	0.0429044	0.0525679	1	0
DG-po	0.0633061	0.0690618	1	0
DG-sg	-0.0054176	0.0182964	0	0
DP	-0.00173398	0.0735659	0	0
ECT2/3	0.043209	0.157525	1	1
ECT5	0.0312563	0.106731	1	1
ECT6a	0.0317999	0.130859	0	0
ENTl2	0.0445283	0.158491	0	1
ENTl3	0.0485722	0.211367	1	1
ENTl5	0.0354266	0.163035	1	1
ENTl6a	0.0308572	0.156136	1	1
ENTm1	0.0490011	0.0698438	1	0
ENTm2	0.0245978	0.0614495	0	0
ENTm3	0.0564414	0.113835	1	0
ENTm5	0.0243431	0.0732949	0	0
ENTm6	0.049064	0.112617	1	0
EPI	0.00665876	0.160397	0	0
EPd	0.0418739	0.209606	1	1
EPv	0.0953489	0.208147	1	1
FL	-0.0208567	-0.000423256	0	0
FOTU	-0.00875402	0.017626	0	0
FRP	-0.0105166	0.0538788	0	0
FS	0.0509471	0.118882	1	0
GPe	0.09133	-0.00602607	0	0
GU2/3	0.031045	0.0923023	0	0
GU5	0.0247094	0.102094	0	1
GU6a	0.0150611	0.133388	0	1
HATA	0.0180296	0.0151494	0	0
ICc	-0.012169	0.0391137	0	0
ICd	0.0160077	0.0156144	0	0
ICe	0.0113548	0.0305228	0	0
ILA	-0.0282553	0.03984	0	0
IP	0.142173	0.16078	0	0
LA	0.0524962	0.0869783	1	1
LD	-0.0151325	0.0681926	0	0
LGd-co	0.0376618	0.250064	0	0
LGv	0.135892	0.130642	0	0
LP	0.00668377	0.273241	0	0
LPO	0.221731	0.134108	1	0
LSr	0.0494872	0.158022	1	0
LSv	0.00394081	0.0666865	0	0
MD	0.00779632	0.0768674	0	0
MEA	0.0434393	0.0881137	0	0
MG	0.0540644	0.0346489	0	0
MOB	-0.000203762	0.116877	0	0
MOp2/3	0.0271688	0.0669292	0	1
MOp5	0.0370917	0.0454407	1	0
MOp6a	0.0109478	0.112528	0	0
MOs1	0.0309824	0.051528	0	0
MOs2/3	-0.00822358	0.0670798	0	1
MOs5	0.0190641	0.0478641	0	0
MOs6a	0.00354913	0.0246223	0	0
MPN	0.0331002	0.0434685	0	0
MPO	0.0409062	0.0796035	0	0
MV	0.0271042	0.0463926	0	0
NOD	-0.0233481	0.000916581	0	0
NTS	0.0356664	0.156767	1	0
ORBl1	0.0297986	0.0434259	0	0
ORBl2/3	-0.0665974	0.045277	1	0
ORBl5	-0.00144194	0.0604508	0	0
ORBl6a	0.000510927	0.15296	0	0
ORBm5	4.60859e-05	0.049168	0	0
ORBvl1	0.0624399	0.11414	1	0
ORBvl2/3	-0.0452586	-0.0213965	1	0
ORBvl5	0.0150619	0.0569442	0	0
OT	0.016491	0.0828792	0	0
PA	0.0192374	0.0427263	0	0
PAA	0.00729229	0.043556	0	0
PAG	0.00826582	0.12084	0	0
PAR	0.0212401	0.0722997	0	0
PB	-0.00707853	0.139327	0	0
PCG	0.0669207	0.190342	1	0
PERI	0.0441671	0.171739	1	1
PF	0.0153779	0.1471	1	0
PFL	0.00236764	0.0269364	0	0
PG	-0.00521713	0.00330508	0	0
PH	0.0680105	0.113657	1	0
PIR	0.0265325	0.0784066	0	1
PL2/3	-0.0038332	0.074023	0	0
PL5	-0.0062227	0.0401729	0	0
PL6a	-0.0342378	0.121882	0	0
PO	-0.0026281	0.101495	0	0
POST	0.0274195	0.0732886	0	0
PRE	0.00998487	0.0360532	0	0
PRM	-0.0117497	0.0215472	0	0
PYR	0.0120066	0.0289473	0	0
ProS	0.0514471	0.0484641	1	0
RSPagl1	0.0626282	0.0559702	1	0
RSPagl2/3	0.0040245	0.0533022	0	0
RSPagl5	0.0220467	0.0310285	0	0
RSPagl6a	-0.00125538	0.0278566	0	0
RSPd2/3	0.0346425	0.0149148	0	0
RSPd5	0.0282229	0.0102516	0	0
RSPd6a	-7.77191e-05	0.0438733	0	0
RSPv2/3	0.0081694	-0.0399146	0	0
RSPv5	0.0314539	0.0100161	0	0
RSPv6a	0.000618989	0.0651859	0	0
RT	0.0406694	0.0889538	0	0
SCdg	-0.00967079	0.0337671	0	0
SCig	-0.0358361	0.0285645	0	0
SCiw	-0.0215321	0.0724411	0	0
SCop	-0.00628119	-0.000829505	0	0
SCsg	0.0155651	0.0488935	0	0
SCzo	0.0207504	0.0762989	0	0
SF	0.0636053	0.26086	1	0
SI	0.0619677	0.102864	0	0
SIM	-0.0111769	0.0162364	0	0
SNr	0.0401017	0.0916567	0	0
SSp-bfd2/3	0.019061	0.02593	0	0
SSp-bfd4	0.0141656	0.0407488	0	0
SSp-bfd5	0.0371117	0.0242701	1	0
SSp-bfd6a	0.00788985	0.0791678	0	0
SSp-ll2/3	0.0350872	0.048862	0	0
SSp-ll5	0.0501713	0.0505828	1	0
SSp-ll6a	0.0118341	0.0910905	0	0
SSp-m2/3	0.0114664	0.0622594	0	0
SSp-m4	-0.0011091	0.016702	0	0
SSp-m5	0.0217955	0.0317561	1	0
SSp-m6a	0.0117153	0.198727	0	0
SSp-n2/3	-0.00324711	0.0322311	0	0
SSp-n4	0.00865598	0.0386291	0	0
SSp-n5	0.0409924	0.0396352	1	0
SSp-n6a	-0.00095362	0.0932158	0	0
SSp-tr2/3	0.0200072	0.0380925	0	0
SSp-ul2/3	0.0411097	0.0488744	1	0
SSp-ul4	0.0221086	0.0394643	0	0
SSp-ul5	0.0434167	0.0361176	1	0
SSp-ul6a	0.0234928	0.104664	0	0
SSp-un	0.0287825	0.0358034	0	0
SSs2/3	0.0293632	0.0630022	1	0
SSs4	0.00347638	0.0534557	0	0
SSs5	0.0343773	0.0454833	1	0
SSs6a	0.0351076	0.139145	1	0
SUB	0.0257897	0.0382805	0	0
TEa2/3	0.0315964	0.0774522	1	1
TEa5	0.0262562	0.084251	1	1
TEa6a	0.027858	0.111226	1	0
TR	0.0430827	0.0756322	0	0
TTd	0.0136395	0.102361	0	0
TTv	0.0222732	0.24668	0	1
UVU	0.00451805	0.0242126	0	0
VAL	0.00302231	0.143275	0	0
VISC2/3	0.031172	0.0744944	0	0
VISC5	0.03245	0.0639905	1	0
VISC6a	0.0317313	0.104737	0	1
VISa2/3	0.0150598	0.00234439	0	0
VISal	-0.0029959	0.0512073	0	0
VISam	0.00334815	0.0750855	0	0
VISl	0.00120008	0.0278488	0	0
VISli	0.00724024	0.0566104	0	0
VISp2/3	0.012672	0.0506273	0	0
VISp4	0.0224057	0.0245785	0	0
VISp5	0.0187617	0.0255539	0	0
VISp6a	0.0014355	0.0459726	0	0
VISpl	0.0131563	0.0621126	0	0
VISpm	0.0138335	0.0381573	0	0
VISpor2/3	0.0305921	0.0522098	1	0
VISpor5	0.00714258	0.0618873	0	0
VISrl	0.0251169	0.0439269	0	0
VM	0.0495482	0.0945231	0	0
VMH	0.0800636	0.0794469	1	0
VPL	0.123458	0.0677192	1	0
VPM	-0.00582065	0.18475	0	0
ZI	0.101566	0.119826	0	0
